# Supplementary material
Source: publisher figshare collection journal article supplement (https://gsapubs.figshare.com/ndownloader/files/23315687)
Supplement: Supplementary file 1 [file 23315687]

## Sheet: WHSL-1
Chen, X., Chen, H., Sobel, E.R., Lin, X., Cheng, X., Yan, J., and Yang, S., Convergence of the Pamir and the South Tian Shan in the late Cenozoic: Insights from provenance analysis in the Wuheshalu section at the convergence area: Lithosphere, https://doi.org/10.1130/L1028.1.1.
GSA Data Repository Item 2019161
Table A1
			238U/232Th	Pb207/Pb206		Pb207/U235		Pb206/U238		Pb208/Th232		Pb207/Pb206		Pb207/U235		Pb206/U238		Pb208/Th232		Δ68-75(%)	Δ68-76(%)
Grain	U [ppm]	Pb [ppm]	Ratio	Ratio	2σ	Ratio	2σ	Ratio	2σ	Ratio	2σ	Age	2σ	Age	2σ	Age	2σ	Age	2σ
W1-001	225.69	21.162	2.32	0.05069	0.002	0.2417	0.00932	0.03458	0.00042	0.01033	0.00057	227	67	220	8	219	3	208	11	-0.454545	-3.52423
W1-002	476.17	26.921	0.86	0.05213	0.00199	0.3387	0.01263	0.04712	0.00056	0.01366	0.00052	291	63	296	10	297	3	274	10	0.337838	2.06186
W1-003	130.53	52.4686	2.27	0.06907	0.00181	1.41071	0.03571	0.14811	0.00174	0.04534	0.00197	901	33	893	15	890	10	896	38	-0.335946	-1.22087
W1-004	154.86	23.3787	2.56	0.05389	0.00374	0.3784	0.02568	0.05091	0.00096	0.01524	0.00158	366	119	326	19	320	6	306	31	-1.84049	-12.5683
W1-005	276.53	27.6401	2.59	0.05035	0.00168	0.23179	0.0075	0.03338	0.00038	0.01002	0.00051	211	54	212	6	212	2	202	10	0	0.473934
W1-006	250.43	23.6053	2.37	0.05104	0.00185	0.23822	0.00842	0.03385	0.0004	0.01076	0.00054	243	60	217	7	215	2	216	11	-0.921659	-11.5226
W1-007	265.76	17.2519	1.01	0.05255	0.00253	0.34461	0.01624	0.04755	0.00063	0.01427	0.00064	309	83	301	12	299	4	286	13	-0.664452	-3.23625
W1-008	65.37	5.66719	1.85	0.05098	0.00568	0.26282	0.029	0.03738	0.00069	0.01418	0.00137	240	215	237	23	237	4	285	27	0	-1.25
W1-009	371.73	86.6654	1.87	0.06382	0.00138	0.90427	0.01872	0.10275	0.00108	0.02973	0.00107	736	26	654	10	631	6	592	21	-3.51682	-14.2663
W1-010	95.11	19.3681	2.69	0.05449	0.00196	0.49217	0.01724	0.0655	0.00079	0.01987	0.00113	391	57	406	12	409	5	398	22	0.738916	4.60358
W1-011	438.26	82.0847	0.8	0.07146	0.00152	1.60314	0.03273	0.16268	0.00171	0.04652	0.00158	971	25	971	13	972	9	919	31	0.102987	0.102987
W1-012	333.4	32.4426	1.08	0.05453	0.00187	0.5096	0.01697	0.06777	0.00084	0.01991	0.00082	393	52	418	11	423	5	398	16	1.19617	7.63359
W1-013	176.21	25.313	1.56	0.05664	0.00183	0.57076	0.01801	0.07308	0.00084	0.02351	0.00099	478	49	459	12	455	5	470	20	-0.87146	-4.81172
W1-014	150.79	12.3864	0.55	0.05872	0.00345	0.73336	0.04244	0.09057	0.00133	0.02773	0.00116	557	101	559	25	559	8	553	23	0	0.359066
W1-015	189.19	146.155	2.11	0.10247	0.00209	4.19221	0.08264	0.2967	0.00322	0.08644	0.00319	1669	21	1672	16	1675	16	1676	59	0.179426	0.359497
W1-016	99.36	9.67023	1.61	0.05237	0.0035	0.35668	0.02347	0.04939	0.00074	0.01412	0.00102	302	123	310	18	311	5	283	20	0.322581	2.98013
W1-017	378.18	138.166	2.88	0.06217	0.00133	0.9457	0.01949	0.11032	0.00116	0.03197	0.00122	680	26	676	10	675	7	636	24	-0.147929	-0.735294
W1-018	827.06	37.168	1.04	0.04981	0.00155	0.22301	0.00673	0.03247	0.00037	0.00932	0.00036	186	49	204	6	206	2	188	7	0.980392	10.7527
W1-019	65.64	6.04588	1.97	0.05184	0.00558	0.27554	0.02935	0.03855	0.00075	0.01291	0.00146	278	204	247	23	244	5	259	29	-1.21457	-12.2302
W1-020	64.33	10.2861	3.25	0.05169	0.00301	0.31051	0.01782	0.04357	0.0006	0.01309	0.00131	272	107	275	14	275	4	263	26	0	1.10294
W1-021	121.05	46.4526	5.04	0.05572	0.00137	0.53389	0.0127	0.06949	0.00075	0.02015	0.00107	441	34	434	8	433	5	403	21	-0.230415	-1.81406
W1-022	151.51	97.1081	3.61	0.07018	0.00146	1.51353	0.03018	0.15642	0.00162	0.04564	0.00178	934	24	936	12	937	9	902	34	0.106838	0.321199
W1-023	289.36	16.9667	0.78	0.05481	0.00296	0.39331	0.02077	0.05204	0.00081	0.01557	0.00075	404	90	337	15	327	5	312	15	-2.96736	-19.0594
W1-024	217.85	45.952	5.51	0.05028	0.00149	0.24381	0.00698	0.03517	0.00041	0.01101	0.00067	208	45	222	6	223	3	221	13	0.45045	7.21154
W1-025	373.97	21.7644	1.46	0.05061	0.00179	0.22135	0.00763	0.03172	0.00037	0.00993	0.00044	223	58	203	6	201	2	200	9	-0.985222	-9.86547
W1-026	42.03	12.231	1.29	0.0737	0.00331	1.74748	0.07713	0.17197	0.00264	0.05263	0.00299	1033	64	1026	29	1023	15	1037	57	-0.292398	-0.968054
W1-027	187.58	14.4152	1.87	0.05107	0.00249	0.2413	0.01152	0.03427	0.00045	0.01008	0.00061	244	86	219	9	217	3	203	12	-0.913242	-11.0656
W1-028	293.13	21.2603	1.54	0.05138	0.00201	0.26877	0.01029	0.03794	0.00047	0.01171	0.00057	258	65	242	8	240	3	235	11	-0.826446	-6.97674
W1-029	202.19	85.849	2.26391	0.14392	0.00311	6.48082	0.13588	0.32659	0.00379	0.119	0.00484	2274.9	36.8	1821.8	18.41	2043.3	18.44	2272.6	87.5	12.1583	-10.1807
W1-030	398.37	45.2288	2.02681	0.05948	0.00145	0.77772	0.01836	0.09484	0.00103	0.02861	0.00117	585	32	584	10	584	6	570	23	0	-0.17094
W1-031	220.61	12.0969	1.69024	0.0599	0.00386	0.36755	0.02318	0.0445	0.00074	0.01365	0.00108	600.1	133.57	280.7	4.58	317.8	17.21	274	21.58	13.217	-47.0422
W1-032	52.46	11.1349	6.39	0.05116	0.00249	0.22052	0.01051	0.03126	0.00041	0.00644	0.00136	248	86	202	9	198	3	130	27	-1.9802	-20.1613
W1-033	55.14	12.7566	1.6	0.06055	0.00334	0.9782	0.05299	0.11716	0.00193	0.03376	0.00228	623	88	693	27	714	11	671	45	3.0303	14.6067
W1-034	185.71	30.9864	0.97	0.06487	0.00192	1.11697	0.03214	0.12489	0.00149	0.038	0.00157	770	40	762	15	759	9	754	31	-0.393701	-1.42857
W1-035	125.44	11.9837	2.47	0.04916	0.00266	0.22782	0.01208	0.03361	0.00047	0.00975	0.00077	155	95	208	10	213	3	196	15	2.40385	37.4194
W1-036	237.12	38.3699	3.61	0.05253	0.00196	0.28342	0.01028	0.03913	0.0005	0.01532	0.00094	309	59	253	8	247	3	307	19	-2.37154	-20.0647
W1-037	71.96	8.33129	2.74	0.0494	0.00324	0.25171	0.0163	0.03696	0.00053	0.01109	0.00108	167	120	228	13	234	3	223	22	2.63158	40.1198
W1-038	43.8	23.4374	3.14	0.06803	0.00205	1.40391	0.04112	0.14967	0.00182	0.04038	0.00247	869	40	891	17	899	10	800	48	0.897868	3.45224
W1-039	123.7	10.1926	1.58	0.05169	0.00304	0.29944	0.01732	0.04202	0.0006	0.01324	0.00084	272	107	266	14	265	4	266	17	-0.37594	-2.57353
W1-040	198.65	48.3002	1.98	0.06033	0.00149	0.85333	0.02031	0.10258	0.00112	0.03016	0.00128	615	33	626	11	630	7	601	25	0.638978	2.43902
W1-041	65.74	14.3618	1.33	0.06527	0.00259	1.16677	0.04526	0.12966	0.00174	0.03669	0.00194	783	59	785	21	786	10	728	38	0.127389	0.383142
W1-042	554.38	70.117	1.4	0.05541	0.00136	0.54576	0.01298	0.07143	0.00078	0.0218	0.00091	429	34	442	9	445	5	436	18	0.678733	3.7296
W1-043	68.82	6.40098	2.27	0.05004	0.00408	0.23797	0.01917	0.03449	0.00054	0.01181	0.00112	197	153	217	16	219	3	237	22	0.921659	11.1675
W1-044	102.03	44.757	2.27	0.07163	0.00185	1.60605	0.04017	0.16263	0.00188	0.04742	0.00224	975	32	973	16	971	10	936	43	-0.20555	-0.410256
W1-045	165.29	12.3473	1.83	0.05133	0.0027	0.23667	0.01223	0.03345	0.00046	0.01106	0.00069	256	94	216	10	212	3	222	14	-1.85185	-17.1875
W1-046	251.26	28.83	0.9	0.05924	0.00195	0.74573	0.02396	0.0913	0.00111	0.02762	0.00124	576	49	566	14	563	7	551	24	-0.530035	-2.25694
W1-047	88.11	10.5419	3.3	0.05173	0.00268	0.23077	0.01174	0.03236	0.00043	0.00923	0.00091	273	92	211	10	205	3	186	18	-2.8436	-24.9084
W1-048	99.46	83.2347	1.27	0.16566	0.00376	10.8962	0.24058	0.47709	0.00549	0.1295	0.0056	2514	22	2514	21	2515	24	2461	100	0.0397772	0.0397772
W1-049	158.11	41.9225	3.88	0.05343	0.00158	0.45145	0.01294	0.06129	0.00072	0.01916	0.00105	347	44	378	9	383	4	384	21	1.32275	10.3746
W1-050	198.96	25.5752	2.89	0.05156	0.00193	0.28011	0.01023	0.0394	0.00049	0.01106	0.00073	266	61	251	8	249	3	222	15	-0.796813	-6.39098
W1-051	148.1	28.5097	2.39	0.05489	0.0019	0.5226	0.01755	0.06906	0.00088	0.02135	0.00121	408	52	427	12	430	5	427	24	0.702576	5.39216
W1-052	226.89	77.7927	3.04	0.06605	0.00166	0.89222	0.02167	0.09798	0.0011	0.03032	0.00145	808	32	648	12	603	6	604	28	-6.94444	-25.3713
W1-053	887.01	322.127	0.72	0.11924	0.00272	5.78551	0.12788	0.35193	0.00382	0.07939	0.00346	1945	24	1944	19	1944	18	1544	65	0	-0.0514139
W1-054	128	27.7068	1.13	0.06817	0.00222	1.36035	0.04323	0.14475	0.00186	0.04274	0.00211	874	44	872	19	871	10	846	41	-0.114679	-0.343249
W1-055	61.47	63.6382	1.73	0.16328	0.00405	10.2374	0.24906	0.4548	0.00583	0.1241	0.00612	2490	24	2456	23	2417	26	2364	110	-1.58795	-2.93173
W1-056	201.07	56.6821	3.28	0.05614	0.00154	0.58865	0.01562	0.07605	0.00087	0.02329	0.0012	458	39	470	10	473	5	465	24	0.638298	3.27511
W1-057	430.1	22.6258	1.34	0.0496	0.00212	0.20941	0.0087	0.03063	0.00042	0.00988	0.00054	176	71	193	7	194	3	199	11	0.518135	10.2273
W1-058	68.19	32.8527	2.45	0.07228	0.00207	1.6639	0.04637	0.16698	0.00203	0.0493	0.00266	994	37	995	18	995	11	973	51	0	0.100604
W1-059	64.85	4.64848	1.48	0.05067	0.00651	0.2639	0.03351	0.03778	0.0009	0.01351	0.00143	226	242	238	27	239	6	271	29	0.420168	5.75221
W1-060	141.87	155.741	6.74	0.0689	0.00171	1.41178	0.03395	0.14863	0.00166	0.04809	0.00247	896	31	894	14	893	9	949	48	-0.111857	-0.334821
W1-061	96.98	182.725	3.63	0.14634	0.00355	8.64752	0.20382	0.42865	0.00481	0.12272	0.00597	2304	25	2302	21	2300	22	2340	107	-0.086881	-0.173611
W1-062	336.37	18.5413	1.38	0.04876	0.00216	0.21267	0.0092	0.03164	0.00042	0.00984	0.00056	136	76	196	8	201	3	198	11	2.55102	47.7941
W1-063	98.09	98.5642	5.89	0.06984	0.00184	1.49427	0.03811	0.15521	0.0018	0.04687	0.00259	924	33	928	16	930	10	926	50	0.215517	0.649351
W1-064	61.81	53.9304	1.34	0.16721	0.00434	11.0496	0.28157	0.47935	0.00616	0.1276	0.00655	2530	26	2527	24	2524	27	2427	117	-0.118718	-0.237154
W1-065	516.47	140.343	1.13	0.07521	0.00191	1.88186	0.04641	0.18149	0.00205	0.05343	0.0026	1074	31	1075	16	1075	11	1052	50	0	0.0931099
W1-066	257.4	27.4359	1.47	0.05394	0.00215	0.43339	0.01685	0.05828	0.00078	0.0177	0.00103	369	63	366	12	365	5	355	20	-0.273224	-1.08401
W1-067	344.53	35.664	1.28	0.05435	0.00205	0.47423	0.01742	0.0633	0.00086	0.01905	0.00107	386	58	394	12	396	5	381	21	0.507614	2.59067
W1-068	67.84	182.737	5.46	0.16	0.00444	8.99037	0.22714	0.40753	0.00469	0.11355	0.00122	2456	48	2337	23	2204	21	2174	22	-5.69106	-10.2606
W1-069	345.33	16.7807	1.02	0.05062	0.00247	0.24489	0.01169	0.03509	0.00049	0.01141	0.00065	224	85	222	10	222	3	229	13	0	-0.892857
W1-070	24.94	23.8166	15.25	0.0541	0.00195	0.4434	0.0156	0.05946	0.00076	0.02133	0.00313	375	56	373	11	372	5	427	62	-0.268097	-0.8
W1-071	82.76	126.388	2.09	0.20099	0.00526	15.2845	0.39136	0.55165	0.00676	0.15073	0.00803	2834	26	2833	24	2832	28	2838	141	-0.0352983	-0.0705716
W1-072	365.32	47.6551	1.19	0.05814	0.00177	0.67249	0.01993	0.08391	0.00102	0.02584	0.00138	535	44	522	12	519	6	516	27	-0.574713	-2.99065
W1-073	54.29	46.3621	3.86	0.07821	0.00226	2.10892	0.05941	0.19562	0.00242	0.05612	0.00347	1152	36	1152	19	1152	13	1104	66	0	0
W1-074	142.34	36.3077	2.42	0.05858	0.00188	0.73354	0.02293	0.09084	0.00114	0.02695	0.0016	552	46	559	13	561	7	538	31	0.357782	1.63043
W1-075	188.82	11.795	1.49	0.05064	0.00294	0.23459	0.01337	0.0336	0.00051	0.01053	0.00074	224	104	214	11	213	3	212	15	-0.46729	-4.91071
W1-076	192.04	17.9807	2.43	0.04904	0.00361	0.22222	0.01598	0.03287	0.00066	0.01129	0.00102	150	124	204	13	208	4	227	20	1.96078	38.6667
W1-077	73.81	5.78357	1.87	0.04533	0.00474	0.21733	0.02249	0.03478	0.00064	0.01158	0.00122	-3	185	200	19	220	4	233	24	10	-7433.33
W1-078	169.01	16.0124	2.57	0.0526	0.00239	0.23094	0.01022	0.03185	0.00045	0.01026	0.00076	312	75	211	8	202	3	206	15	-4.2654	-35.2564
W1-079	89.41	57.3541	3.13	0.07457	0.00215	1.82908	0.05122	0.17795	0.00216	0.05427	0.00315	1057	37	1056	18	1056	12	1068	60	0	-0.0946074
W1-080	81.52	17.4742	1.87	0.05921	0.00238	0.7766	0.03046	0.09514	0.00131	0.02914	0.0019	575	61	584	17	586	8	581	37	0.342466	1.91304
W1-081	36.78	257.639	12.98	0.16041	0.00433	10.2603	0.26997	0.46401	0.00545	0.12533	0.00742	2460	29	2459	24	2457	24	2387	133	-0.0813339	-0.121951
W1-082	67.07	6.02178	1.34	0.05275	0.00482	0.38745	0.03503	0.05328	0.00095	0.01582	0.00145	318	172	333	26	335	6	317	29	0.600601	5.34591
W1-083	238.58	22.6625	2.36	0.0499	0.0022	0.23767	0.01023	0.03455	0.00048	0.01095	0.00078	190	74	217	8	219	3	220	16	0.921659	15.2632
W1-084	243.61	169.432	1	0.16769	0.00476	11.1305	0.30893	0.48154	0.00601	0.13568	0.00776	2535	30	2534	26	2534	26	2572	138	0	-0.0394477
W1-085	183.78	164.28	1.45	0.15952	0.00468	10.1479	0.29238	0.46151	0.00621	0.12523	0.00746	2451	31	2448	27	2446	27	2385	134	-0.0816993	-0.203998
W1-086	234.37	15.5906	1.07	0.05181	0.00251	0.32968	0.01568	0.04616	0.00064	0.01536	0.00096	277	84	289	12	291	4	308	19	0.692042	5.05415
W1-087	270.09	36.4294	1.39	0.05645	0.0023	0.5943	0.02357	0.07638	0.0011	0.02457	0.00159	470	62	474	15	474	7	491	31	0	0.851064
W1-088	105.51	9.56174	2.24	0.05043	0.00342	0.23493	0.01569	0.0338	0.00055	0.01247	0.00107	215	122	214	13	214	3	250	21	0	-0.465116
W1-089	342.42	38.3154	1.45	0.05443	0.00193	0.45904	0.01587	0.06118	0.0008	0.01987	0.00123	389	54	384	11	383	5	398	24	-0.260417	-1.54242
W1-090	61.45	53.8678	26.42	0.0501	0.00164	0.22169	0.00705	0.0321	0.0004	0.00869	0.00126	200	51	203	6	204	2	175	25	0.492611	2
W1-091	29.03	13.2564	14.78	0.04927	0.00248	0.20005	0.00986	0.02946	0.00044	0.01128	0.00241	161	86	185	8	187	3	227	48	1.08108	16.1491
W1-092	172.82	15.9887	1.95	0.0507	0.00242	0.2784	0.01298	0.03983	0.00058	0.01235	0.00091	227	81	249	10	252	4	248	18	1.20482	11.0132
W1-093	79.91	6.38211	1.74	0.05075	0.00515	0.26253	0.02626	0.03753	0.00079	0.01255	0.00136	229	187	237	21	238	5	252	27	0.421941	3.93013
W1-094	50.88	7.59296	0.82	0.06504	0.0045	1.14642	0.07816	0.12787	0.00243	0.03814	0.00289	776	112	776	37	776	14	757	56	0	0
W1-095	188.13	50.6993	3.67	0.05475	0.00181	0.49649	0.01598	0.06579	0.00084	0.02084	0.00139	402	49	409	11	411	5	417	28	0.488998	2.23881
W1-096	32.13	19.1562	1.55	0.10412	0.00389	4.33841	0.15938	0.30231	0.00482	0.08669	0.00633	1699	44	1701	30	1703	24	1680	118	0.117578	0.235433
W1-097	55.14	30.494	2.02	0.0841	0.00334	2.58562	0.10069	0.22304	0.00369	0.07421	0.00552	1295	50	1297	29	1298	19	1447	104	0.077101	0.23166
W1-098	329.38	17.519	1.23	0.05065	0.00246	0.23406	0.01115	0.03352	0.00049	0.01047	0.00073	225	83	214	9	213	3	211	15	-0.46729	-5.33333
W1-099	36.13	5.95241	2.96	0.05152	0.00432	0.34517	0.02857	0.0486	0.00088	0.01686	0.0022	264	154	301	22	306	5	338	44	1.66113	15.9091
W1-100	252.98	45.0658	1.49	0.05978	0.00211	0.78975	0.02719	0.09584	0.00128	0.02975	0.00196	596	51	591	15	590	8	593	38	-0.169205	-1.00671

## Sheet: WHSL-2
			238U/232Th	Pb207/Pb206		Pb207/U235		Pb206/U238		Pb208/Th232		Pb207/Pb206		Pb207/U235		Pb206/U238		Pb208/Th232		Δ68-75(%)	Δ68-76(%)
Grain	U [ppm]	Pb [ppm]	Ratio	Ratio	2σ	Ratio	2σ	Ratio	2σ	Ratio	2σ	Age	2σ	Age	2σ	Age	2σ	Age	2σ
W2-001	354.78	14.5254	1.97	0.05213	0.00302	0.24899	0.01414	0.03462	0.00054	0.01111	0.00076	291	101	226	11	219	3	223	15	-3.09735	-24.7423
W2-002	205.19	6.63531	1.99	0.04828	0.00415	0.18591	0.01583	0.02791	0.00045	0.00795	0.00076	113	159	173	14	177	3	160	15	2.31214	56.6372
W2-003	60.71	2.76161	1.55	0.04986	0.01034	0.25196	0.05195	0.03662	0.00094	0.01263	0.00193	188	342	228	42	232	6	254	39	1.75439	23.4043
W2-004	203.05	23.6399	3.26	0.06098	0.00205	0.87136	0.02867	0.10357	0.00134	0.03238	0.00207	639	48	636	16	635	8	644	41	-0.157233	-0.625978
W2-005	344.73	41.8529	2.08	0.06053	0.00161	0.85705	0.02219	0.10263	0.0012	0.03287	0.00137	623	36	629	12	630	7	654	27	0.158983	1.1236
W2-006	1042.73	75.4711	3.39	0.05435	0.00131	0.48738	0.01136	0.065	0.00073	0.02028	0.00085	386	32	403	8	406	4	406	17	0.744417	5.18135
W2-007	1180.57	235.96	1.32941	0.23136	0.00438	4.40781	0.08082	0.13809	0.00145	0.04358	0.00147	3061.5	29.97	833.9	8.24	1713.8	15.17	862.2	28.44	105.516	-44.0209
W2-008	261.37	24.3936	1.2	0.05846	0.00232	0.58371	0.02259	0.07237	0.00101	0.02264	0.00105	547	60	467	14	450	6	453	21	-3.64026	-17.7331
W2-009	63.61	6.86716	1.92	0.05817	0.00471	0.69452	0.05548	0.08654	0.00159	0.03643	0.00297	536	144	536	33	535	9	723	58	-0.186567	-0.186567
W2-010	444.59	157.956	5.70499	0.13313	0.00258	5.64396	0.1063	0.3073	0.0033	0.09201	0.00356	2139.6	33.48	1727.4	16.28	1922.8	16.25	1779.1	65.86	11.3118	-10.1327
W2-011	389.69	52.2069	1.04	0.06027	0.00147	0.83518	0.01976	0.10045	0.00114	0.03159	0.00114	613	32	616	11	617	7	629	22	0.162338	0.652529
W2-012	589.7	146.129	2.09	0.08094	0.0017	2.32414	0.04736	0.20814	0.0023	0.0609	0.00225	1220	23	1220	14	1219	12	1195	43	-0.0819672	-0.0819672
W2-013	162.09	8.79191	1.12	0.05222	0.00402	0.29939	0.02262	0.04156	0.00077	0.01313	0.00088	295	139	266	18	262	5	264	18	-1.50376	-11.1864
W2-014	163.17	29.312	1.15	0.06782	0.0022	1.31685	0.04178	0.14074	0.00188	0.03837	0.00171	863	44	853	18	849	11	761	33	-0.468933	-1.62225
W2-015	382.35	28.1847	1.03	0.05249	0.00189	0.39279	0.01379	0.05424	0.00069	0.0186	0.00075	307	57	336	10	341	4	372	15	1.4881	11.0749
W2-016	74.45	4.43324	0.93	0.05751	0.00796	0.34196	0.04673	0.0431	0.00111	0.01404	0.00126	511	259	299	35	272	7	282	25	-9.0301	-46.771
W2-017	205.97	35.221	3.35	0.06926	0.00199	1.45405	0.04078	0.15219	0.00196	0.04372	0.00249	906	37	912	17	913	11	865	48	0.109649	0.772627
W2-019	1332.96	867.723	0.77	0.16007	0.00314	9.7214	0.18561	0.44026	0.00478	0.11553	0.004	2456	18	2409	18	2352	21	2210	72	-2.36613	-4.23453
W2-020	654.97	71.9412	3.39	0.05983	0.00136	0.81313	0.01789	0.09851	0.00109	0.02904	0.00119	597	29	604	10	606	6	579	23	0.331126	1.50754
W2-021	113.46	9.90992	1.76	0.05615	0.00337	0.56244	0.03324	0.07261	0.00114	0.02263	0.0016	458	103	453	22	452	7	452	32	-0.220751	-1.31004
W2-022	504.61	226.989	2.23	0.13557	0.00278	6.92398	0.13855	0.37024	0.00415	0.08831	0.0034	2171	20	2102	18	2031	20	1710	63	-3.37774	-6.44864
W2-023	452.46	19.791	1.19	0.05282	0.00292	0.25005	0.0135	0.03432	0.00055	0.01027	0.0006	321	94	227	11	218	3	207	12	-3.96476	-32.0872
W2-024	376.88	21.6106	2.38	0.05353	0.00195	0.36081	0.0128	0.04886	0.00062	0.0175	0.00091	351	57	313	10	308	4	351	18	-1.59744	-12.2507
W2-025	72.05	10.7053	1.54	0.06806	0.0031	1.13532	0.0507	0.12093	0.00179	0.03518	0.00215	870	68	770	24	736	10	699	42	-4.41558	-15.4023
W2-026	216.52	100.026	4.5	0.1405	0.0031	7.61665	0.16483	0.39301	0.00481	0.11068	0.00547	2233	21	2187	19	2137	22	2122	100	-2.28624	-4.29915
W2-027	533.6	108.4	3.44747	0.09928	0.00211	2.36671	0.04874	0.17282	0.00191	0.06261	0.00247	1610.6	39.04	1027.6	10.48	1232.6	14.7	1227.4	46.96	19.9494	-23.4695
W2-028	235.07	19.8367	1.58	0.05628	0.00263	0.53279	0.02429	0.06863	0.00105	0.02201	0.00126	463	74	434	16	428	6	440	25	-1.38249	-7.5594
W2-029	158.2	144.817	4.22	0.28248	0.00578	26.8636	0.54099	0.68943	0.00799	0.19067	0.00811	3377	17	3379	20	3380	30	3527	138	0.0295946	0.0888362
W2-030	78.37	15.9752	0.76	0.07194	0.00341	1.39262	0.06464	0.14033	0.00238	0.04347	0.00217	984	67	886	27	847	13	860	42	-4.40181	-13.9228
W2-031	451.2	36.8506	2.05	0.05663	0.00158	0.54223	0.0147	0.06942	0.00082	0.02129	0.00095	477	39	440	10	433	5	426	19	-1.59091	-9.22432
W2-032	160.24	40.6014	0.74	0.07379	0.0022	1.75953	0.05115	0.17289	0.00229	0.05339	0.0022	1036	37	1031	19	1028	13	1051	42	-0.29098	-0.772201
W2-033	45.95	15.1859	1.76	0.0974	0.00412	3.59053	0.14976	0.26725	0.00509	0.07849	0.00573	1575	50	1547	33	1527	26	1527	107	-1.29282	-3.04762
W2-034	324.84	12.5704	1.71	0.05032	0.00284	0.22439	0.01242	0.03233	0.00048	0.00975	0.00064	210	101	206	10	205	3	196	13	-0.485437	-2.38095
W2-035	137.43	8.92859	1.43	0.0523	0.00523	0.36963	0.03636	0.05124	0.00116	0.0179	0.00161	299	181	319	27	322	7	359	32	0.940439	7.69231
W2-036	80.23	12.7021	1.15	0.06337	0.00298	1.07339	0.04958	0.1228	0.00186	0.03566	0.00198	721	72	740	24	747	11	708	39	0.945946	3.6061
W2-037	182.51	33.4098	2.61	0.07144	0.00205	1.56843	0.04395	0.15917	0.00203	0.04498	0.00238	970	36	958	17	952	11	889	46	-0.626305	-1.85567
W2-038	532.48	94.0793	1.2	0.06558	0.00161	1.22202	0.02914	0.13509	0.00156	0.04374	0.00176	793	31	811	13	817	9	865	34	0.739827	3.02648
W2-039	178.39	15.8446	1.79	0.0558	0.00257	0.5636	0.02546	0.07323	0.00106	0.02431	0.00141	444	75	454	17	456	6	485	28	0.440529	2.7027
W2-040	1245.5	63.3484	2.2	0.05249	0.00143	0.31707	0.00838	0.0438	0.00051	0.01336	0.0006	307	39	280	6	276	3	268	12	-1.42857	-10.0977
W2-041	395.88	31.3111	1.59	0.05775	0.00206	0.51697	0.01794	0.0649	0.00087	0.01951	0.001	520	53	423	12	405	5	391	20	-4.25532	-22.1154
W2-042	564.72	201.463	2.18	0.10359	0.00234	4.20254	0.09242	0.29416	0.00333	0.08705	0.00363	1689	24	1675	18	1662	17	1687	67	-0.776119	-1.59858
W2-043	276.63	109.42	1.4	0.10605	0.00249	4.48909	0.10293	0.30692	0.00363	0.08957	0.0038	1733	25	1729	19	1726	18	1734	70	-0.173511	-0.403924
W2-044	189.49	97.5786	2.96	0.14367	0.00343	8.36495	0.19605	0.42216	0.00532	0.12681	0.00608	2272	23	2271	21	2270	24	2413	109	-0.0440335	-0.0880282
W2-045	371.56	69.5623	0.75	0.06504	0.00178	1.13077	0.03007	0.12606	0.00154	0.04174	0.00177	776	35	768	14	765	9	827	34	-0.390625	-1.41753
W2-046	2816.4	201.967	1087.41	0.05635	0.00142	0.53913	0.01224	0.06939	0.00075	0.02159	0.00344	466	57	438	8	433	5	432	68	-1.14155	-7.08155
W2-047	402.44	31.0272	1.9	0.05717	0.00188	0.50981	0.01635	0.06466	0.00083	0.02014	0.00102	498	48	418	11	404	5	403	20	-3.34928	-18.8755
W2-048	203	21.8214	1.19	0.05601	0.00247	0.63634	0.02741	0.08237	0.00122	0.02698	0.00144	453	69	500	17	510	7	538	28	2	12.5828
W2-049	310.9	103.609	3.80539	0.11836	0.00279	4.67119	0.1075	0.28617	0.00335	0.07957	0.00375	1931.6	41.68	1622.4	16.78	1762.1	19.25	1547.5	70.2	8.6107	-8.77511
W2-050	110.8	16.4951	1.15	0.06172	0.00339	0.95916	0.05159	0.11269	0.00205	0.03681	0.00227	664	84	683	27	688	12	731	44	0.732064	3.61446
W2-051	97.6	55.3762	1.03	0.14754	0.00382	8.29391	0.21187	0.40763	0.00557	0.11128	0.00521	2318	25	2264	23	2204	26	2133	95	-2.65018	-4.91803
W2-052	609.94	102.442	14.52	0.07344	0.00207	1.59537	0.04374	0.15751	0.00201	0.05197	0.0046	1026	35	968	17	943	11	1024	88	-2.58264	-8.08967
W2-053	427.72	19.0119	2.33	0.05203	0.00207	0.2752	0.01068	0.03836	0.00051	0.01213	0.00072	287	64	247	9	243	3	244	14	-1.61943	-15.331
W2-054	113.97	18.1603	1.46	0.0651	0.003	1.14141	0.05145	0.12715	0.00204	0.03972	0.0024	778	68	773	24	772	12	787	47	-0.129366	-0.771208
W2-055	1403.9	69.7849	0.73	0.05889	0.00211	0.27489	0.00954	0.03385	0.00046	0.01064	0.00051	563	52	247	8	215	3	214	10	-12.9555	-61.8117
W2-056	430.78	4.55719	1.64	0.04719	0.00651	0.05595	0.00762	0.0086	0.00021	0.00297	0.00035	59	234	55	7	55	1	60	7	0	-6.77966
W2-057	247.5	12.3554	0.83	0.05123	0.00302	0.24781	0.01432	0.03507	0.00056	0.01154	0.00063	251	104	225	12	222	3	232	13	-1.33333	-11.5538
W2-058	231.96	102.441	1.18	0.11364	0.00287	5.22106	0.12877	0.33315	0.00406	0.09214	0.00426	1858	27	1856	21	1854	20	1781	79	-0.107759	-0.215285
W2-059	406.78	17.4953	2.24	0.05038	0.00224	0.25558	0.01114	0.03679	0.00051	0.01207	0.00076	213	75	231	9	233	3	243	15	0.865801	9.38967
W2-060	267.36	12.4826	1.25	0.05192	0.00285	0.26226	0.01413	0.03663	0.00057	0.01142	0.00071	282	95	236	11	232	4	230	14	-1.69492	-17.7305
W2-061	174.98	7.14278	1.21	0.0514	0.00519	0.22789	0.0227	0.03215	0.00067	0.00945	0.00084	259	186	208	19	204	4	190	17	-1.92308	-21.2355
W2-062	284.4	26.5534	2.47	0.05663	0.00202	0.63472	0.02213	0.08127	0.00109	0.02408	0.00146	477	53	499	14	504	6	481	29	1.002	5.66038
W2-063	232.81	36.0795	5.22	0.06739	0.00225	1.30906	0.04257	0.14086	0.00192	0.04512	0.00332	850	45	850	19	850	11	892	64	0	0
W2-064	137.56	101.958	0.66	0.16425	0.00431	10.6883	0.27564	0.4719	0.00609	0.131	0.00632	2500	26	2496	24	2492	27	2488	113	-0.160256	-0.32
W2-065	134.72	19.38	4.84	0.06521	0.00261	1.17064	0.04577	0.13019	0.00194	0.043	0.00377	781	57	787	21	789	11	851	73	0.25413	1.02433
W2-066	809.49	470.729	55.79	0.17575	0.00448	12.1768	0.30315	0.50245	0.00594	0.15389	0.01118	2613	26	2618	23	2624	25	2893	196	0.229183	0.420972
W2-067	64.57	11.6753	2.15	0.06873	0.00331	1.45813	0.06896	0.15386	0.00254	0.04417	0.00349	891	70	913	28	923	14	874	68	1.09529	3.59147
W2-068	180.72	11.6862	1.3	0.05155	0.003	0.35844	0.02049	0.05043	0.00081	0.0168	0.00108	266	102	311	15	317	5	337	21	1.92926	19.1729
W2-069	333.87	185.666	1.42985	0.16163	0.00425	9.21104	0.23654	0.41328	0.00507	0.12072	0.00602	2472.8	43.69	2229.9	23.15	2359.2	23.52	2303.7	108.55	5.79847	-4.59398
W2-070	60.03	11.6667	0.79	0.06638	0.00362	1.22785	0.06585	0.13415	0.0023	0.04258	0.00253	818	83	813	30	811	13	843	49	-0.246002	-0.855746
W2-071	477.99	52.616	4.62	0.06045	0.00187	0.83084	0.02499	0.09968	0.00127	0.03314	0.002	620	43	614	14	613	7	659	39	-0.162866	-1.12903
W2-072	169.6	99.1943	1.12	0.14537	0.00417	8.5536	0.24154	0.42672	0.00597	0.11759	0.0063	2292	30	2292	26	2291	27	2247	114	-0.04363	-0.04363
W2-073	483.78	18.7209	2.52	0.05068	0.00242	0.23439	0.01094	0.03354	0.0005	0.011	0.0008	226	80	214	9	213	3	221	16	-0.46729	-5.75221
W2-074	1012.17	62.2714	0.92	0.05292	0.00175	0.33171	0.01065	0.04546	0.00058	0.01356	0.00072	325	50	291	8	287	4	272	14	-1.37457	-11.6923
W2-075	460.38	20.2553	2.14	0.05099	0.00234	0.26181	0.01172	0.03724	0.00055	0.01254	0.00083	240	76	236	9	236	3	252	17	0	-1.66667
W2-076	187.73	21.6135	3.73	0.06059	0.00241	0.85716	0.03323	0.1026	0.00149	0.03403	0.00257	625	58	629	18	630	9	676	50	0.158983	0.8
W2-077	201.78	122.388	5.37	0.17621	0.00489	12.1726	0.33041	0.50102	0.00637	0.15178	0.00869	2618	28	2618	25	2618	27	2856	152	0	0
W2-078	179.82	15.354	1.93	0.05614	0.00318	0.55436	0.03075	0.07161	0.00123	0.02237	0.00181	458	93	448	20	446	7	447	36	-0.446429	-2.62009
W2-079	372.95	66.5227	1.93	0.07038	0.0022	1.43345	0.04357	0.14771	0.00193	0.04636	0.00262	939	41	903	18	888	11	916	51	-1.66113	-5.43131
W2-080	77.46	13.2489	1.53	0.0676	0.00339	1.29799	0.06385	0.13925	0.00234	0.03943	0.0029	856	74	845	28	840	13	782	56	-0.591716	-1.86916
W2-081	1181.71	47.7279	2.58	0.05027	0.00174	0.24216	0.00817	0.03494	0.00046	0.01191	0.00072	207	54	220	7	221	3	239	14	0.454545	6.76329
W2-082	508.46	167.796	8.55	0.10308	0.00298	4.22452	0.11922	0.29724	0.00371	0.08377	0.00507	1680	34	1679	23	1678	18	1626	95	-0.0595593	-0.119048
W2-083	164.35	36.0496	1.14	0.07391	0.0028	1.6335	0.0604	0.1603	0.00238	0.0577	0.00345	1039	51	983	23	958	13	1134	66	-2.54323	-7.79596
W2-084	213.99	28.962	3.83	0.06482	0.00243	1.07919	0.03945	0.12076	0.00171	0.03817	0.00288	768	53	743	19	735	10	757	56	-1.07672	-4.29688
W2-085	974.18	87.8753	2.53	0.05681	0.0018	0.61	0.01879	0.07788	0.001	0.02516	0.00147	484	45	484	12	483	6	502	29	-0.206612	-0.206612
W2-086	541.82	8.22779	0.8	0.04865	0.00456	0.07217	0.00668	0.01076	0.0002	0.00329	0.00024	131	172	71	6	69	1	66	5	-2.8169	-47.3282
W2-087	557.64	23.5333	1.13	0.05105	0.00229	0.22734	0.00998	0.0323	0.00046	0.01015	0.00063	243	75	208	8	205	3	204	13	-1.44231	-15.6379
W2-088	503.49	156.997	4.06	0.10036	0.00324	3.76534	0.11887	0.27214	0.00384	0.07758	0.00523	1631	38	1585	25	1552	19	1510	98	-2.08202	-4.84365
W2-089	131.88	9.02968	1.18	0.05292	0.00423	0.3864	0.03046	0.05296	0.00099	0.01646	0.00132	325	145	332	22	333	6	330	26	0.301205	2.46154
W2-090	1104.96	72.4636	0.8	0.05443	0.00187	0.34044	0.0114	0.04537	0.0006	0.01484	0.00087	389	51	298	9	286	4	298	17	-4.02685	-26.4781
W2-091	337.46	16.8805	1.14	0.05097	0.00299	0.26451	0.01523	0.03764	0.00061	0.01281	0.00087	239	103	238	12	238	4	257	17	0	-0.41841
W2-092	82.55	56.0328	1.14	0.16575	0.00553	11.1207	0.36715	0.48666	0.00786	0.13698	0.00873	2515	34	2533	31	2556	34	2595	155	0.908014	1.63022
W2-093	238.64	116.469	1.00151	0.17358	0.0054	8.05823	0.24451	0.33674	0.00449	0.09826	0.00587	2592.5	50.95	1871	21.67	2237.6	27.41	1894.5	108.03	19.5938	-13.6895
W2-094	137.39	31.8876	0.7	0.06896	0.00279	1.50808	0.05964	0.15862	0.00244	0.04569	0.00286	898	56	934	24	949	14	903	55	1.606	5.67929
W2-095	315.42	28.4123	1.92	0.05668	0.00239	0.58634	0.02409	0.07503	0.00113	0.02422	0.00167	479	64	469	15	466	7	484	33	-0.639659	-2.71399
W2-096	501.61	170.111	1.13	0.09115	0.00291	3.16871	0.09856	0.25217	0.00333	0.07825	0.00475	1450	39	1450	24	1450	17	1523	89	0	0
W2-097	177.8	125.122	1.52	0.18699	0.00601	13.4106	0.42342	0.52022	0.00747	0.14464	0.00911	2716	33	2709	30	2700	32	2730	161	-0.332226	-0.589102
W2-098	267.23	19.309	3.71	0.05737	0.00308	0.50483	0.02638	0.06382	0.00114	0.02382	0.00227	506	83	415	18	399	7	476	45	-3.85542	-21.1462
W2-099	138.04	6.69922	1.08	0.05035	0.0055	0.25639	0.02764	0.03693	0.0008	0.0114	0.00106	211	203	232	22	234	5	229	21	0.862069	10.9005
W2-100	159.09	10.4301	1.18	0.05381	0.0051	0.37784	0.03524	0.05094	0.00112	0.0154	0.00147	363	171	325	26	320	7	309	29	-1.53846	-11.8457

## Sheet: WHSL-3
			238U/232Th	Pb207/Pb206		Pb207/U235		Pb206/U238		Pb208/Th232		Pb207/Pb206		Pb207/U235		Pb206/U238		Pb208/Th232		Δ68-75(%)	Δ68-76(%)
Grain	U [ppm]	Pb [ppm]	Ratio	Ratio	2σ	Ratio	2σ	Ratio	2σ	Ratio	2σ	Age	2σ	Age	2σ	Age	2σ	Age	2σ
W3-001	245.31	58.919	1.06	0.07507	0.00166	1.90855	0.04092	0.18453	0.00208	0.05587	0.00182	1070	25	1084	14	1092	11	1099	35	0.738007	2.05607
W3-002	397.48	15.4878	2.91	0.0516	0.00227	0.2487	0.01072	0.03498	0.00046	0.01038	0.00074	268	75	226	9	222	3	209	15	-1.76991	-17.1642
W3-003	370.61	21.0468	1.76	0.0531	0.00195	0.35649	0.01275	0.04873	0.0006	0.0139	0.00066	333	59	310	10	307	4	279	13	-0.967742	-7.80781
W3-004	219.9	21.4375	0.83	0.05895	0.00221	0.56284	0.02057	0.0693	0.0009	0.02046	0.00079	565	57	453	13	432	5	409	16	-4.63576	-23.5398
W3-005	191.29	9.91788	2.32	0.0513	0.00312	0.32503	0.0195	0.04599	0.00067	0.01491	0.00112	254	111	286	15	290	4	299	22	1.3986	14.1732
W3-006	215.62	8.85237	2.23	0.04714	0.00355	0.23358	0.01738	0.03596	0.00055	0.01093	0.00094	56	135	213	14	228	3	220	19	7.04225	307.143
W3-007	785.14	163.879	2.11	0.07354	0.00139	1.79726	0.03267	0.17737	0.00184	0.05425	0.00173	1029	21	1044	12	1053	10	1068	33	0.862069	2.33236
W3-009	356.03	20.0875	2.55	0.04999	0.00207	0.3627	0.01468	0.05266	0.00067	0.01629	0.00091	195	70	314	11	331	4	327	18	5.41401	69.7436
W3-010	586.55	50.9867	1.14	0.05458	0.00144	0.52272	0.01338	0.06951	0.00078	0.02018	0.0007	395	37	427	9	433	5	404	14	1.40515	9.62025
W3-011	227.74	17.9376	2.4	0.05168	0.00233	0.52575	0.02324	0.07383	0.00098	0.02504	0.0014	271	77	429	15	459	6	500	28	6.99301	69.3727
W3-012	1388.9	155.554	2.7	0.06064	0.00116	0.83284	0.01525	0.09967	0.00102	0.02958	0.00096	626	22	615	8	612	6	589	19	-0.487805	-2.23642
W3-013	484.75	68.2883	1.05	0.06094	0.00136	0.90233	0.01944	0.10746	0.00116	0.03239	0.00105	637	28	653	10	658	7	644	21	0.765697	3.2967
W3-014	272.13	15.1095	3.09	0.05414	0.00234	0.36013	0.01521	0.04828	0.00063	0.01672	0.00109	377	71	312	11	304	4	335	22	-2.5641	-19.3634
W3-015	408.45	162.482	2.56	0.11499	0.0021	5.53525	0.09684	0.34935	0.00364	0.10128	0.0033	1880	17	1906	15	1931	17	1950	61	1.31165	2.71277
W3-016	107.21	4.09979	3.06	0.0489	0.0062	0.23092	0.02903	0.03427	0.00068	0.0104	0.002	143	239	211	24	217	4	209	40	2.8436	51.7483
W3-017	562.05	21.6783	2.58	0.04758	0.00172	0.23849	0.0084	0.03637	0.00044	0.01182	0.00058	78	58	217	7	230	3	238	12	5.99078	194.872
W3-019	489.83	27.554	1.59	0.05306	0.00171	0.33824	0.01061	0.04626	0.00055	0.01448	0.00059	331	49	296	8	292	3	291	12	-1.35135	-11.7825
W3-020	417.24	25.1386	3.33	0.05422	0.00177	0.4017	0.01276	0.05377	0.00064	0.01875	0.00097	380	50	343	9	338	4	375	19	-1.45773	-11.0526
W3-021	541.15	24.0579	1.19	0.05134	0.00172	0.24324	0.0079	0.03438	0.00041	0.01105	0.00042	256	53	221	6	218	3	222	8	-1.35747	-14.8438
W3-023	245.18	22.4299	1.67	0.05539	0.00197	0.57851	0.02002	0.07579	0.00094	0.02183	0.001	428	55	464	13	471	6	436	20	1.50862	10.0467
W3-025	961.81	34.1175	6.48	0.05183	0.00137	0.24357	0.0062	0.0341	0.00038	0.01063	0.00066	278	38	221	5	216	2	214	13	-2.26244	-22.3022
W3-026	256.82	10.6754	1.75	0.05823	0.00313	0.27352	0.01442	0.03408	0.00049	0.01081	0.00069	538	90	246	11	216	3	217	14	-12.1951	-59.8513
W3-027	208.28	18.5276	1.78	0.05619	0.00217	0.57411	0.02164	0.07413	0.00096	0.02358	0.00114	460	60	461	14	461	6	471	23	0	0.217391
W3-028	352.01	12.6738	6.68	0.05209	0.00252	0.24067	0.01139	0.03353	0.00045	0.00997	0.00142	289	84	219	9	213	3	201	28	-2.73973	-26.2976
W3-029	295.54	38.2449	1.25	0.06169	0.00165	0.87159	0.02249	0.10253	0.00119	0.03023	0.00113	663	35	636	12	629	7	602	22	-1.10063	-5.12821
W3-030	300.06	64.5942	1.84	0.08037	0.00173	2.00199	0.04146	0.18076	0.00198	0.05361	0.00194	1206	24	1116	14	1071	11	1056	37	-4.03226	-11.194
W3-031	106.36	21.5387	1.49	0.07472	0.00232	1.6926	0.05113	0.16436	0.00215	0.04992	0.00222	1061	40	1006	19	981	12	985	43	-2.48509	-7.54006
W3-032	241.96	15.4964	1.39	0.05147	0.00245	0.36397	0.01698	0.05131	0.00068	0.0163	0.0008	262	83	315	13	323	4	327	16	2.53968	23.2824
W3-033	229.63	43.4454	2.06	0.07436	0.00177	1.70322	0.03911	0.16619	0.0019	0.04774	0.00191	1051	28	1010	15	991	11	943	37	-1.88119	-5.70885
W3-034	326.55	47.8105	2.27	0.06432	0.00156	1.11744	0.02616	0.12605	0.00142	0.03736	0.0015	752	31	762	13	765	8	741	29	0.393701	1.72872
W3-035	669.56	26.7414	3.7	0.04982	0.00197	0.26593	0.01024	0.03873	0.00048	0.01119	0.00067	187	66	239	8	245	3	225	13	2.51046	31.016
W3-036	835.95	67.3843	19.63	0.05711	0.00132	0.61442	0.01365	0.07806	0.00084	0.0233	0.00212	496	30	486	9	485	5	466	42	-0.205761	-2.21774
W3-037	563.3	23.6318	1.66	0.0496	0.00179	0.24074	0.00845	0.03522	0.00043	0.01087	0.0005	176	59	219	7	223	3	219	10	1.82648	26.7045
W3-038	701	28.0512	3.24	0.05196	0.00144	0.23598	0.00632	0.03295	0.00037	0.0104	0.00048	284	41	215	5	209	2	209	10	-2.7907	-26.4085
W3-039	918.58	37.9169	3.87358	0.06268	0.0016	0.29391	0.0072	0.03402	0.00038	0.01298	0.00059	697.4	53.46	215.7	2.37	261.6	5.65	260.7	11.7	21.2796	-62.4892
W3-040	189.6	10.5222	2.31	0.05138	0.00291	0.35007	0.01946	0.04944	0.00071	0.01374	0.00108	258	102	305	15	311	4	276	22	1.96721	20.5426
W3-041	355.67	21.0716	2.15	0.059	0.00199	0.3979	0.01302	0.04893	0.0006	0.01559	0.00076	567	50	340	9	308	4	313	15	-9.41176	-45.679
W3-042	401.67	22.6194	1.12	0.0511	0.00195	0.29896	0.01111	0.04245	0.00053	0.0139	0.00059	245	62	266	9	268	3	279	12	0.75188	9.38776
W3-043	306.29	30.5776	1.30966	0.26343	0.00595	3.49975	0.07442	0.09639	0.00118	0.07624	0.00284	3267.4	35.11	593.2	6.91	1527.2	16.79	1485	53.28	157.451	-53.2595
W3-044	579.28	24.9689	1.53	0.05186	0.00182	0.24782	0.00844	0.03467	0.00042	0.01036	0.00047	279	56	225	7	220	3	208	9	-2.22222	-21.147
W3-045	1519.78	59.5546	3.77	0.05279	0.00132	0.25124	0.00605	0.03453	0.00038	0.0111	0.00049	320	35	228	5	219	2	223	10	-3.94737	-31.5625
W3-046	370.29	20.3318	2.43	0.05214	0.00193	0.34144	0.01227	0.04751	0.00059	0.01499	0.00081	292	59	298	9	299	4	301	16	0.33557	2.39726
W3-047	254.76	22.1638	1.45	0.05753	0.00206	0.53481	0.01856	0.06744	0.00085	0.02177	0.00101	512	54	435	12	421	5	435	20	-3.21839	-17.7734
W3-048	536.01	31.6835	2.17	0.05628	0.00164	0.389	0.01096	0.05015	0.00058	0.01685	0.00073	463	42	334	8	315	4	338	15	-5.68862	-31.9654
W3-049	361.83	143.078	2.15	0.11491	0.00244	5.11698	0.10439	0.32307	0.00351	0.09244	0.00353	1878	21	1839	17	1805	17	1787	65	-1.84883	-3.88711
W3-050	328.56	13.7543	1.82	0.04694	0.00291	0.23598	0.0144	0.03647	0.00053	0.01242	0.0008	46	105	215	12	231	3	249	16	7.44186	402.174
W3-051	741.71	29.2043	2.68	0.05046	0.00163	0.23898	0.00747	0.03436	0.00041	0.01099	0.00054	216	50	218	6	218	3	221	11	0	0.925926
W3-052	435.9	19.9968	2.84	0.05048	0.00193	0.27957	0.01039	0.04018	0.0005	0.01444	0.0008	217	63	250	8	254	3	290	16	1.6	17.0507
W3-053	142.86	7.03117	1.36	0.05478	0.00452	0.29839	0.02426	0.03952	0.00068	0.01172	0.00093	403	153	265	19	250	4	236	19	-5.66038	-37.9653
W3-054	614.67	23.8816	3.15	0.05079	0.00179	0.24189	0.00826	0.03455	0.00042	0.01067	0.00062	231	56	220	7	219	3	215	12	-0.454545	-5.19481
W3-055	451.24	16.8023	2.82	0.0559	0.00225	0.26547	0.0104	0.03446	0.00045	0.01165	0.00071	448	64	239	8	218	3	234	14	-8.78661	-51.3393
W3-056	449.4	28.6087	2.46	0.05426	0.00171	0.40911	0.01244	0.0547	0.00065	0.01669	0.00083	382	47	348	9	343	4	335	17	-1.43678	-10.2094
W3-057	510.29	343.129	2.45	0.18901	0.00408	14.1049	0.2917	0.5414	0.00582	0.14253	0.00558	2734	20	2757	20	2789	24	2693	99	1.16068	2.0117
W3-058	262.39	30.2065	2.33	0.06108	0.00185	0.82407	0.02414	0.09788	0.00119	0.02819	0.00141	642	42	610	13	602	7	562	28	-1.31148	-6.23053
W3-059	94.28	48.4299	2.37	0.14141	0.00342	8.44015	0.19841	0.433	0.00547	0.11835	0.00552	2245	24	2280	21	2319	25	2261	100	1.71053	3.29621
W3-060	415.37	17.815	1.82	0.05141	0.0022	0.2534	0.01059	0.03576	0.00047	0.01149	0.00062	259	72	229	9	226	3	231	12	-1.31004	-12.7413
W3-061	532.81	22.9641	2.78	0.05229	0.0019	0.26945	0.00948	0.03738	0.00046	0.01118	0.00065	298	58	242	8	237	3	225	13	-2.06612	-20.4698
W3-062	830.96	34.6144	1.45	0.05074	0.00166	0.23349	0.00738	0.03339	0.0004	0.00998	0.00046	229	51	213	6	212	2	201	9	-0.469484	-7.42358
W3-063	325.03	12.6158	2.39821	0.05993	0.00282	0.29249	0.01343	0.03541	0.0005	0.0116	0.00079	601.1	98.89	224.3	3.1	260.5	10.55	233.2	15.77	16.1391	-56.6628
W3-064	153.18	31.472	0.73	0.06888	0.00238	1.31675	0.04411	0.13868	0.00185	0.0413	0.00186	895	47	853	19	837	10	818	36	-1.87573	-6.48045
W3-065	41.28	10.4063	0.61	0.07499	0.00452	1.69122	0.10022	0.16361	0.00302	0.05039	0.00265	1068	89	1005	38	977	17	994	51	-2.78607	-8.5206
W3-066	128.32	16.3621	2.69	0.07116	0.0031	1.11237	0.04714	0.11341	0.00168	0.03336	0.0025	962	62	759	23	693	10	663	49	-8.69565	-27.9626
W3-067	119.71	7.29901	1.75	0.0599	0.00391	0.41869	0.02683	0.05071	0.00083	0.0165	0.00122	600	111	355	19	319	5	331	24	-10.1408	-46.8333
W3-068	177.14	13.4162	2.55983	0.10248	0.00381	0.98846	0.0353	0.06997	0.00102	0.03439	0.00194	1669.6	67.28	436	6.15	697.9	18.02	683.4	37.82	60.0688	-58.1996
W3-069	575.62	35.0177	1.68	0.0542	0.00171	0.37365	0.01141	0.05002	0.0006	0.01442	0.00069	379	47	322	8	315	4	289	14	-2.17391	-16.8865
W3-070	181.18	25.4192	1.73295	0.07322	0.00234	1.04316	0.03209	0.10336	0.00133	0.03452	0.00176	1020.1	63.33	634	7.78	725.5	15.95	686	34.39	14.4322	-28.8795
W3-071	371.22	30.5144	2.62	0.05634	0.00184	0.55003	0.01731	0.07083	0.00087	0.02185	0.00118	466	48	445	11	441	5	437	23	-0.898876	-5.36481
W3-072	676.6	28.5816	1.53	0.0501	0.0018	0.23728	0.00826	0.03436	0.00043	0.00974	0.00049	200	57	216	7	218	3	196	10	0.925926	9
W3-073	267.64	24.155	1.57	0.05728	0.00207	0.56228	0.0197	0.07121	0.00091	0.02216	0.00115	502	54	453	13	443	5	443	23	-2.20751	-11.753
W3-074	214.6	28.1884	1.65369	0.08845	0.00274	1.17977	0.03503	0.09676	0.00125	0.04029	0.00198	1392.3	58.13	595.4	7.34	791.2	16.32	798.3	38.4	32.8855	-43.1732
W3-075	108.94	47.8481	1.63	0.11553	0.00309	5.46785	0.1414	0.34336	0.00433	0.09716	0.00468	1888	29	1896	22	1903	21	1874	86	0.369198	0.794492
W3-076	320.69	14.9141	2.75	0.05289	0.00239	0.29251	0.01289	0.04012	0.00055	0.01205	0.00086	324	75	261	10	254	3	242	17	-2.68199	-21.6049
W3-077	161.07	6.36132	2.96	0.04959	0.00434	0.23915	0.02068	0.03499	0.0006	0.00941	0.00136	176	163	218	17	222	4	189	27	1.83486	26.1364
W3-078	744.3	153.382	4.86	0.0758	0.00194	1.90625	0.04665	0.18245	0.00206	0.0567	0.00271	1090	31	1083	16	1080	11	1115	52	-0.277008	-0.917431
W3-079	317.92	19.9471	1.65	0.05445	0.00233	0.36151	0.01504	0.04817	0.00065	0.01597	0.00091	390	69	313	11	303	4	320	18	-3.19489	-22.3077
W3-080	858.33	33.0812	2.08	0.05161	0.00168	0.24231	0.00761	0.03406	0.00041	0.01057	0.00053	268	50	220	6	216	3	213	11	-1.81818	-19.403
W3-081	322.9	11.9321	2.05564	0.06321	0.00367	0.2975	0.01684	0.03415	0.00054	0.01069	0.00098	715.2	118.66	216.4	3.4	264.4	13.18	214.9	19.54	22.1811	-63.0313
W3-082	308.1	38.9488	1.52	0.06461	0.00203	0.90346	0.02725	0.10145	0.00127	0.02976	0.00151	762	42	654	15	623	7	593	30	-4.74006	-18.2415
W3-083	133.85	8.01708	1.56	0.05424	0.00394	0.35466	0.02533	0.04744	0.0008	0.01443	0.00113	381	131	308	19	299	5	290	23	-2.92208	-21.5223
W3-084	1450.5	54.8071	3.68	0.05076	0.00154	0.23487	0.00684	0.03357	0.0004	0.01033	0.00056	230	45	214	6	213	2	208	11	-0.46729	-7.3913
W3-085	315.28	10.688	3.71	0.05521	0.00323	0.25363	0.01452	0.03333	0.00051	0.01053	0.00093	421	101	230	12	211	3	212	19	-8.26087	-49.8812
W3-086	235.37	55.4227	1.64	0.07636	0.00224	1.90219	0.05349	0.18072	0.00223	0.05265	0.00267	1105	36	1082	19	1071	12	1037	51	-1.01664	-3.07692
W3-087	269.58	42.196	1.56	0.06579	0.00208	1.10415	0.0335	0.12175	0.00153	0.03726	0.00193	800	42	755	16	741	9	739	38	-1.8543	-7.375
W3-088	265.38	11.6682	1.7	0.04977	0.00291	0.23663	0.01357	0.03449	0.00051	0.01162	0.00076	184	104	216	11	219	3	234	15	1.38889	19.0217
W3-089	356.99	14.6961	1.8	0.05101	0.00255	0.23533	0.01148	0.03347	0.00047	0.01058	0.00068	241	87	215	9	212	3	213	14	-1.39535	-12.0332
W3-090	521.53	20.2785	3.48	0.05058	0.00209	0.23911	0.00956	0.0343	0.00045	0.01053	0.00074	222	68	218	8	217	3	212	15	-0.458716	-2.25225
W3-091	236.4	10.4759	1.59	0.05229	0.00322	0.24543	0.0148	0.03405	0.00053	0.01042	0.00077	298	110	223	12	216	3	210	15	-3.13901	-27.5168
W3-092	1309.9	51.4533	2.33	0.0535	0.00168	0.24918	0.00752	0.03379	0.00041	0.01017	0.00054	350	46	226	6	214	3	205	11	-5.30973	-38.8571
W3-093	132.48	12.1523	1.90564	0.16627	0.00563	1.90105	0.06102	0.08295	0.00122	0.06382	0.00357	2520.4	55.82	513.7	7.28	1081.5	21.36	1250.5	67.86	110.531	-57.0901
W3-094	218.34	12.3273	1.72	0.05466	0.00291	0.34921	0.01813	0.04635	0.00069	0.01294	0.00092	398	90	304	14	292	4	260	18	-3.94737	-26.6332
W3-095	181.32	10.4141	1.57	0.0486	0.00509	0.30078	0.03112	0.04488	0.00071	0.01422	0.00052	129	234	267	24	283	4	285	10	5.99251	119.38
W3-096	305.03	165.203	1.32651	0.16746	0.00486	9.12211	0.25467	0.3952	0.00511	0.08447	0.00458	2532.4	47.93	2146.9	23.63	2350.3	25.55	1639.1	85.44	9.47413	-7.19081
W3-097	249.87	10.1612	1.87084	0.05663	0.00332	0.26483	0.01518	0.03392	0.00052	0.01107	0.00083	476.6	125.42	215.1	3.26	238.6	12.19	222.6	16.51	10.9252	-49.9371
W3-098	923.73	114.309	3.3	0.06492	0.00192	0.956	0.02702	0.10683	0.00128	0.03382	0.00182	772	39	681	14	654	7	672	36	-3.96476	-15.285
W3-099	333.06	13.7825	2.83	0.04996	0.00266	0.24493	0.01274	0.03557	0.00052	0.0112	0.00091	193	93	222	10	225	3	225	18	1.35135	16.5803
W3-100	166.03	13.0644	4.48	0.05952	0.00302	0.58537	0.02894	0.07135	0.00109	0.01987	0.00222	586	81	468	19	444	7	398	44	-5.12821	-24.2321
W3-101	920.76	34.724	2.72	0.05429	0.00191	0.24507	0.00825	0.03275	0.00042	0.00979	0.00059	383	52	223	7	208	3	197	12	-6.72646	-45.6919
W3-102	302.86	35.645	1.37	0.06173	0.00219	0.77394	0.02643	0.09096	0.0012	0.02673	0.00153	665	50	582	15	561	7	533	30	-3.60825	-15.6391
W3-103	553.43	30.0134	2.23	0.05519	0.00206	0.34372	0.01235	0.04518	0.0006	0.01373	0.00084	420	56	300	9	285	4	276	17	-5	-32.1429
W3-104	1096.03	46.893	1.29	0.05306	0.00184	0.23622	0.00784	0.0323	0.00041	0.00997	0.00056	331	52	215	6	205	3	201	11	-4.65116	-38.0665
W3-105	388.95	15.6559	2.71	0.05184	0.0024	0.24442	0.01096	0.03421	0.00048	0.01087	0.00079	278	77	222	9	217	3	219	16	-2.25225	-21.9424
W3-106	201	9.38992	1.52296	0.05865	0.00418	0.30517	0.02132	0.03775	0.00064	0.01405	0.00107	554	148.33	238.9	3.97	270.4	16.58	282	21.29	13.1854	-51.1913
W3-107	53.27	25.0964	1.24	0.11627	0.0041	5.50849	0.18796	0.34371	0.00527	0.09764	0.00598	1900	39	1902	29	1904	25	1883	110	0.105152	0.210526
W3-108	332.92	13.8654	2.34	0.05062	0.00271	0.24295	0.01266	0.03482	0.00051	0.01092	0.00083	224	93	221	10	221	3	220	17	0	-1.33929
W3-109	340.14	14.3061	2.62	0.05485	0.00275	0.28803	0.01404	0.0381	0.00056	0.01116	0.00097	406	83	257	11	241	3	224	19	-6.22568	-40.6404
W3-110	265.66	49.0689	0.66	0.06667	0.00235	1.08597	0.03672	0.11819	0.00157	0.03475	0.00197	827	48	747	18	720	9	690	38	-3.61446	-12.9383

## Sheet: WHSL-4
			238U/232Th	Pb207/Pb206		Pb207/U235		Pb206/U238		Pb208/Th232		Pb207/Pb206		Pb207/U235		Pb206/U238		Pb208/Th232		Δ68-75(%)	Δ68-76(%)
Grain	U [ppm]	Pb [ppm]	Ratio	Ratio	2σ	Ratio	2σ	Ratio	2σ	Ratio	2σ	Age	2σ	Age	2σ	Age	2σ	Age	2σ
W4-001	735.98	61.8554	2.1832	0.05502	0.00124	0.54484	0.01181	0.07178	0.00078	0.0225	0.0008	413	29	442	8	447	5	450	16	1.13122	8.23245
W4-002	453.74	37.6582	2.07244	0.05608	0.00151	0.54661	0.01423	0.07066	0.00082	0.0214	0.00088	456	37	443	9	440	5	428	17	-0.677201	-3.50877
W4-003	446.62	18.6223	2.70662	0.05142	0.00194	0.25978	0.00955	0.03662	0.00046	0.01157	0.00064	260	61	234	8	232	3	233	13	-0.854701	-10.7692
W4-004	470.76	19.5049	1.40681	0.04694	0.00177	0.21784	0.00801	0.03364	0.00041	0.00993	0.00042	46	58	200	7	213	3	200	8	6.5	363.043
W4-005	344.88	69.2685	0.675957	0.06628	0.0015	1.24334	0.02728	0.13597	0.00152	0.03899	0.00128	815	27	820	12	822	9	773	25	0.243902	0.858896
W4-006	457.5	91.9668	5.72447	0.08692	0.00178	2.15439	0.0425	0.17966	0.00197	0.06446	0.00264	1358.8	38.88	1065.1	10.78	1166.5	13.68	1262.6	50.12	9.52023	-14.1522
W4-007	369.22	49.0102	1.42517	0.06344	0.00179	0.93462	0.0255	0.10679	0.00132	0.03115	0.00125	723	37	670	13	654	8	620	25	-2.38806	-9.54357
W4-008	288.86	25.5132	2.1507	0.05634	0.00179	0.5869	0.01811	0.07551	0.00094	0.02309	0.00107	466	46	469	12	469	6	461	21	0	0.643777
W4-009	568.13	38.0395	0.762703	0.05192	0.00158	0.33021	0.00976	0.0461	0.00055	0.01464	0.00052	282	46	290	7	291	3	294	10	0.344828	3.19149
W4-010	298.66	161.976	2.14508	0.15452	0.00294	9.31045	0.1719	0.43677	0.00479	0.10503	0.00366	2397	17	2369	17	2336	21	2019	67	-1.39299	-2.54485
W4-011	747.65	292.815	8.03493	0.12959	0.00242	6.21707	0.11221	0.34778	0.00365	0.07694	0.00294	2092	18	2007	16	1924	17	1498	55	-4.13553	-8.03059
W4-012	322.92	19.1464	1.07651	0.05159	0.00199	0.32042	0.01205	0.04502	0.00057	0.01397	0.00058	267	63	282	9	284	4	280	12	0.70922	6.36704
W4-013	554.03	42.1144	2.09701	0.05525	0.00146	0.49271	0.01262	0.06465	0.00075	0.02036	0.00082	422	37	407	9	404	5	407	16	-0.737101	-4.2654
W4-014	268.03	13.271	1.45867	0.05714	0.00242	0.31238	0.01294	0.03963	0.00052	0.01264	0.00062	497	68	276	10	251	3	254	12	-9.05797	-49.497
W4-015	211.63	28.2306	1.56427	0.06192	0.00188	0.89987	0.02654	0.10535	0.00132	0.03792	0.00155	671	42	652	14	646	8	752	30	-0.920245	-3.72578
W4-016	168.69	32.9623	0.686569	0.06373	0.00191	1.15272	0.0336	0.13111	0.00166	0.03986	0.00145	733	40	779	16	794	9	790	28	1.92555	8.32196
W4-017	346.87	74.331	1.83714	0.07237	0.00159	1.76657	0.03759	0.17696	0.00199	0.05435	0.00197	996	25	1033	14	1050	11	1070	38	1.64569	5.42169
W4-018	708.47	36.0578	2.54571	0.05153	0.0014	0.31664	0.00835	0.04454	0.00051	0.01394	0.00058	265	40	279	6	281	3	280	12	0.716846	6.03774
W4-019	147.05	10.617	1.92298	0.05634	0.00286	0.46509	0.02313	0.05984	0.00091	0.02065	0.00126	466	83	388	16	375	6	413	25	-3.35052	-19.5279
W4-020	901.35	67.6739	4.09835	0.05418	0.00127	0.5118	0.01164	0.06848	0.00076	0.02143	0.00091	379	31	420	8	427	5	429	18	1.66667	12.6649
W4-021	410.68	50.9394	0.921365	0.05848	0.00153	0.74025	0.01877	0.09177	0.00107	0.02684	0.00098	548	35	563	11	566	6	535	19	0.53286	3.28467
W4-022	245.92	58.0811	1.2236	0.07571	0.00177	1.92223	0.04371	0.18406	0.00215	0.05284	0.00196	1087	27	1089	15	1089	12	1041	38	0	0.183993
W4-023	1751.79	4.64438	1.17485	0.04748	0.00557	0.01323	0.00153	0.00202	4e-05	0.00069	5e-05	73	216	13	2	13	0.3	14	1	0	-82.1918
W4-024	250.57	49.339	0.788501	0.0677	0.00164	1.30445	0.03073	0.13968	0.00161	0.04013	0.00144	859	30	848	14	843	9	795	28	-0.589623	-1.86263
W4-025	328.8	29.3976	1.40519	0.05541	0.00172	0.54691	0.01655	0.07155	0.00089	0.02245	0.00093	429	45	443	11	445	5	449	18	0.451467	3.7296
W4-026	931.45	385.519	3.16928	0.14537	0.00284	6.79497	0.12877	0.33886	0.0036	0.11371	0.00399	2292.1	33.25	1881.2	17.33	2085.1	16.77	2176.8	72.39	10.8388	-9.03102
W4-027	317.81	176.95	1.87255	0.1467	0.00296	8.80005	0.17269	0.43486	0.00484	0.13136	0.00474	2308	19	2317	18	2328	22	2495	85	0.474752	0.866551
W4-028	675.42	89.7253	1.62411	0.06025	0.00137	0.91415	0.02008	0.10999	0.00122	0.03196	0.00119	613	29	659	11	673	7	636	23	2.12443	9.78793
W4-029	179.05	26.6418	3.72478	0.06685	0.00197	1.23745	0.03551	0.1342	0.00171	0.03862	0.00237	833	39	818	16	812	10	766	46	-0.733496	-2.52101
W4-030	663.59	29.4426	2.18387	0.04958	0.00173	0.25907	0.00879	0.03788	0.00048	0.0128	0.00061	175	55	234	7	240	3	257	12	2.5641	37.1429
W4-031	171.04	6.43642	1.79532	0.04905	0.00387	0.21472	0.01669	0.03174	0.00055	0.00968	0.0008	150	142	198	14	201	3	195	16	1.51515	34
W4-032	542.57	20.1005	2.54584	0.05325	0.00193	0.23704	0.00837	0.03227	0.00041	0.01064	0.00057	339	57	216	7	205	3	214	11	-5.09259	-39.528
W4-033	306.73	12.6237	1.95059	0.05371	0.00242	0.25538	0.01127	0.03447	0.00046	0.01166	0.00062	359	75	231	9	218	3	234	12	-5.62771	-39.2758
W4-034	868.34	378.236	1.27071	0.11238	0.0023	5.17252	0.10275	0.33369	0.0036	0.094	0.00339	1838	21	1848	17	1856	17	1816	63	0.4329	0.979325
W4-035	588.93	182.931	0.701383	0.08058	0.00173	2.34463	0.04896	0.21095	0.00233	0.06141	0.00223	1211	24	1226	15	1234	12	1205	42	0.652529	1.89926
W4-036	404.64	18.0445	1.7925	0.05279	0.00271	0.26976	0.01352	0.03704	0.00057	0.01224	0.00075	320	86	243	11	234	4	246	15	-3.7037	-26.875
W4-037	575.52	331.279	3.78308	0.17812	0.00367	11.5928	0.23257	0.47185	0.00516	0.13155	0.00502	2635	19	2572	19	2492	23	2498	90	-3.11042	-5.42694
W4-038	678.54	55.2674	2.08621	0.05808	0.0015	0.55656	0.01391	0.06947	0.00081	0.0216	0.00091	533	34	449	9	433	5	432	18	-3.56347	-18.7617
W4-039	1224.65	7.89584	2.34074	0.04626	0.00335	0.03524	0.00251	0.00552	9e-05	0.00203	0.00016	11	124	35	2	35.5	0.6	41	3	1.42857	222.727
W4-040	1033.01	52.2351	0.901287	0.11108	0.00264	0.49723	0.01136	0.03245	0.00038	0.0137	0.00053	1817.2	42.48	205.9	2.35	409.8	7.71	275	10.5	99.0287	-77.4488
W4-041	491.23	14.3863	2.79394	0.04956	0.00224	0.17691	0.00782	0.02588	0.00035	0.00861	0.00056	174	78	165	7	165	2	173	11	0	-5.17241
W4-042	388.56	16.6218	1.67881	0.05112	0.00219	0.25237	0.01058	0.03579	0.00049	0.01078	0.00059	246	71	228	9	227	3	217	12	-0.438596	-7.72358
W4-043	217.52	156.514	1.17795	0.18265	0.004	13.0661	0.281	0.51863	0.00603	0.1423	0.00563	2677	21	2684	20	2693	26	2689	100	0.33532	0.597684
W4-044	1001.54	45.3961	1.11394	0.05328	0.00166	0.25419	0.00768	0.03458	0.00043	0.01114	0.00048	341	46	230	6	219	3	224	10	-4.78261	-35.7771
W4-045	872.24	38.4316	1.08976	0.05199	0.00157	0.24539	0.00722	0.03422	0.00041	0.01001	0.00043	285	45	223	6	217	3	201	9	-2.69058	-23.8596
W4-046	412.32	16.7689	2.1097	0.04847	0.00197	0.23436	0.00932	0.03506	0.00046	0.011	0.0006	122	68	214	8	222	3	221	12	3.73832	81.9672
W4-047	350.01	22.4522	1.54837	0.05363	0.00195	0.391	0.01386	0.05286	0.00069	0.01599	0.00079	356	56	335	10	332	4	321	16	-0.895522	-6.74157
W4-048	318.01	29.9464	1.15678	0.05846	0.00182	0.5898	0.01792	0.07315	0.00091	0.02221	0.00099	547	45	471	11	455	5	444	20	-3.39703	-16.819
W4-049	1010.52	42.617	1.23195	0.05277	0.00151	0.24156	0.00673	0.03319	0.0004	0.01031	0.00044	319	41	220	6	210	2	207	9	-4.54545	-34.1693
W4-050	476.66	65.2243	2.02112	0.06148	0.00159	0.97552	0.02467	0.11504	0.00136	0.03827	0.00167	656	34	691	13	702	8	759	33	1.5919	7.0122
W4-051	764.83	85.8246	2.45413	0.05902	0.00146	0.79454	0.01917	0.0976	0.00112	0.03092	0.00134	568	33	594	11	600	7	615	26	1.0101	5.6338
W4-052	89.1	67.8196	1.72775	0.19806	0.00475	15.7186	0.37442	0.57537	0.00751	0.1564	0.00717	2810	22	2860	23	2930	31	2937	125	2.44755	4.27046
W4-053	225.68	40.181	4.81297	0.07032	0.00197	1.58485	0.04331	0.1634	0.00205	0.04686	0.0028	938	36	964	17	976	11	926	54	1.24481	4.05117
W4-054	417.24	23.7967	1.9878	0.05085	0.0018	0.34278	0.01185	0.04887	0.00063	0.01503	0.00078	234	56	299	9	308	4	302	16	3.01003	31.6239
W4-055	224.3	86.613	1.48859	0.10587	0.00259	4.45152	0.10671	0.30484	0.00367	0.08901	0.0039	1729	27	1722	20	1715	18	1723	72	-0.406504	-0.809717
W4-056	100.27	21.4686	1.44273	0.07304	0.00236	1.73714	0.05503	0.17243	0.00234	0.05106	0.00256	1015	42	1022	20	1025	13	1007	49	0.293542	0.985222
W4-057	388.01	34.909	0.492373	0.05605	0.00187	0.41934	0.01365	0.05424	0.00069	0.01678	0.00074	454	50	356	10	341	4	336	15	-4.21348	-24.8899
W4-058	2139.34	75.9771	1.61468	0.05239	0.00146	0.21366	0.00581	0.02957	0.00035	0.00892	0.00041	302	40	197	5	188	2	179	8	-4.56853	-37.7483
W4-059	1198.55	218.754	1.59585	0.07109	0.00171	1.45306	0.03413	0.14818	0.00169	0.04682	0.00203	960	30	911	14	891	9	925	39	-2.19539	-7.1875
W4-060	1313.61	47.4141	4.60544	0.05068	0.00232	0.22899	0.01013	0.03277	0.0004	0.01033	0.00011	226	108	209	8	208	2	208	2	-0.478469	-7.9646
W4-061	272.23	17.3945	1.41772	0.0516	0.00228	0.36832	0.01597	0.05175	0.00074	0.01624	0.0009	268	73	318	12	325	5	326	18	2.20126	21.2687
W4-062	155.11	12.6348	1.73385	0.05553	0.00259	0.52238	0.02389	0.0682	0.00099	0.0211	0.00129	434	76	427	16	425	6	422	26	-0.468384	-2.07373
W4-063	273.04	23.7575	1.37275	0.0581	0.00201	0.5674	0.01924	0.0708	0.00093	0.0204	0.00107	534	51	456	12	441	6	408	21	-3.28947	-17.4157
W4-064	628.33	43.5377	13.9196	0.05668	0.00165	0.52358	0.01488	0.06697	0.00082	0.02024	0.00207	479	41	428	10	418	5	405	41	-2.33645	-12.7349
W4-065	121.98	15.7301	0.854022	0.06207	0.00286	0.81096	0.03656	0.09473	0.00154	0.02715	0.00152	677	68	603	20	583	9	541	30	-3.31675	-13.8848
W4-066	316.69	14.6328	2.67588	0.05204	0.00221	0.2949	0.01226	0.04108	0.00056	0.01258	0.00085	287	70	262	10	260	3	253	17	-0.763359	-9.40767
W4-067	205.05	124.926	2.19657	0.16395	0.00418	11.0412	0.27753	0.48824	0.00597	0.13126	0.00632	2497	26	2527	23	2563	26	2493	113	1.42461	2.64317
W4-068	364.17	15.5168	1.51934	0.05296	0.00247	0.25574	0.01169	0.03501	0.00052	0.01086	0.00066	327	77	231	9	222	3	218	13	-3.8961	-32.1101
W4-069	367.72	33.006	1.69793	0.05492	0.00178	0.56691	0.01796	0.07484	0.00096	0.02354	0.00122	409	48	456	12	465	6	470	24	1.97368	13.6919
W4-070	466.2	90.7083	2.97625	0.09431	0.00266	2.20718	0.06109	0.16967	0.00218	0.04753	0.00259	1514.3	52.37	1010.3	12.03	1183.3	19.34	938.5	50.04	17.1236	-21.8583
W4-071	303.14	18.2857	1.30923	0.05304	0.00236	0.34618	0.01511	0.04732	0.00068	0.01621	0.00091	331	73	302	11	298	4	325	18	-1.3245	-9.96979
W4-072	354.92	51.0954	4.05577	0.06474	0.00194	1.16963	0.03449	0.13098	0.00167	0.04138	0.00236	766	41	786	16	793	10	820	46	0.890585	3.5248
W4-073	363.82	31.9823	6.1425	0.05813	0.00192	0.66352	0.0215	0.08275	0.00109	0.02472	0.00185	535	48	517	13	513	6	494	36	-0.773694	-4.11215
W4-074	863.82	117.336	2.18004	0.06736	0.0019	1.09186	0.03025	0.11752	0.00145	0.0336	0.00173	849	37	749	15	716	8	668	34	-4.40587	-15.6655
W4-075	898.05	60.0007	1.4732	0.05422	0.00167	0.40873	0.01237	0.05466	0.00069	0.0169	0.00087	380	45	348	9	343	4	339	17	-1.43678	-9.73684
W4-076	116.91	21.3029	1.38421	0.06935	0.00367	1.36747	0.07101	0.14296	0.00277	0.04871	0.00343	909	75	875	30	861	16	961	66	-1.6	-5.28053
W4-077	564.87	22.205	1.82499	0.04849	0.00201	0.22132	0.00898	0.03309	0.00046	0.01101	0.00065	123	69	203	7	210	3	221	13	3.44828	70.7317
W4-078	366.69	19.56	1.2731	0.05191	0.00225	0.30327	0.01292	0.04235	0.00061	0.01345	0.00078	281	71	269	10	267	4	270	16	-0.743494	-4.98221
W4-079	435.42	25.4798	1.24737	0.05284	0.00192	0.33423	0.01192	0.04586	0.00062	0.01516	0.00083	322	56	293	9	289	4	304	17	-1.36519	-10.2484
W4-080	522.49	48.7844	1.21151	0.05659	0.00183	0.57449	0.01823	0.07359	0.00096	0.02265	0.0012	476	47	461	12	458	6	453	24	-0.650759	-3.78151
W4-081	331.35	43.1449	4.51062	0.06398	0.00207	1.05634	0.03358	0.11971	0.00159	0.03743	0.00238	741	45	732	17	729	9	743	46	-0.409836	-1.61943
W4-082	466.28	18.7048	2.96277	0.05016	0.00219	0.24804	0.01066	0.03585	0.00051	0.01214	0.00085	202	73	225	9	227	3	244	17	0.888889	12.3762
W4-083	514.61	73.8579	1.80419	0.06617	0.00205	1.10423	0.03368	0.12099	0.00158	0.03591	0.00199	812	42	755	16	736	9	713	39	-2.51656	-9.35961
W4-084	627.67	24.4757	2.55431	0.05085	0.002	0.24181	0.00932	0.03448	0.00048	0.01106	0.00071	234	63	220	8	219	3	222	14	-0.454545	-6.41026
W4-085	269.35	15.5218	2.91789	0.05392	0.00266	0.37879	0.01834	0.05093	0.00078	0.01833	0.0014	368	81	326	14	320	5	367	28	-1.84049	-13.0435
W4-086	444.13	85.3832	1.67754	0.07242	0.00223	1.56377	0.04739	0.15654	0.00204	0.05254	0.00292	998	40	956	19	938	11	1035	56	-1.88285	-6.01202
W4-087	516.28	36.4188	1.62296	0.05349	0.00193	0.42346	0.015	0.05739	0.00078	0.02052	0.00119	350	55	359	11	360	5	411	24	0.278552	2.85714
W4-088	234.68	41.2914	1.21988	0.07021	0.00232	1.33391	0.04341	0.13774	0.00187	0.04223	0.00241	935	44	861	19	832	11	836	47	-3.36818	-11.016
W4-089	353.49	38.1804	8.08717	0.06286	0.00204	0.88924	0.02849	0.10256	0.00135	0.03105	0.00239	703	46	646	15	629	8	618	47	-2.63158	-10.5263
W4-090	1336.95	50.6906	4.0963	0.05161	0.00172	0.2513	0.00824	0.0353	0.00046	0.01004	0.00063	268	51	228	7	224	3	202	13	-1.75439	-16.4179
W4-091	626.72	55.4589	1.30771	0.05503	0.00184	0.53541	0.01761	0.07053	0.00094	0.02261	0.00131	413	50	435	12	439	6	452	26	0.91954	6.2954
W4-092	747.52	28.455	4.48961	0.05168	0.0019	0.25187	0.00913	0.03533	0.00048	0.01162	0.00081	271	58	228	7	224	3	234	16	-1.75439	-17.3432
W4-093	296.14	13.5823	1.66567	0.04859	0.00249	0.25604	0.01292	0.0382	0.00057	0.01262	0.00084	128	87	231	10	242	4	253	17	4.7619	89.0625
W4-094	784.17	30.4733	2.70161	0.05082	0.00194	0.24294	0.00913	0.03465	0.00048	0.01105	0.00073	233	61	221	7	220	3	222	15	-0.452489	-5.5794
W4-095	761.04	70.0572	1.65483	0.0589	0.00189	0.6293	0.01996	0.07745	0.00101	0.02261	0.00132	563	46	496	12	481	6	452	26	-3.02419	-14.5648
W4-096	473.99	19.5224	2.95542	0.04915	0.00209	0.25014	0.01045	0.03689	0.00053	0.01257	0.00089	155	71	227	8	234	3	252	18	3.0837	50.9677
W4-097	57.49	9.47268	1.52818	0.06163	0.00363	1.14906	0.0668	0.13515	0.00242	0.04222	0.00326	661	94	777	32	817	14	836	63	5.14801	23.6006
W4-098	421.88	17.12	2.17789	0.05041	0.00242	0.24561	0.01159	0.03532	0.00053	0.01127	0.00081	214	81	223	9	224	3	227	16	0.44843	4.6729
W4-099	241.25	9.5185	2.56267	0.05526	0.00322	0.26579	0.01529	0.03487	0.00056	0.01108	0.00101	423	100	239	12	221	3	223	20	-7.53138	-47.7541
W4-100	106.06	11.4126	1.09668	0.05786	0.00332	0.65438	0.03703	0.08198	0.00137	0.0271	0.00185	524	95	511	23	508	8	540	36	-0.587084	-3.05344

## Sheet: WHSL-5
			238U/232Th	Pb207/Pb206		Pb207/U235		Pb206/U238		Pb208/Th232		Pb207/Pb206		Pb207/U235		Pb206/U238		Pb208/Th232		Δ68-75(%)	Δ68-76(%)
Grain	U [ppm]	Pb [ppm]	Ratio	Ratio	2σ	Ratio	2σ	Ratio	2σ	Ratio	2σ	Age	2σ	Age	2σ	Age	2σ	Age	2σ
W5-007	996.79	35.1753	7.01	0.05162	0.00146	0.23177	0.00637	0.03257	0.00035	0.01001	0.00076	269	43	212	5	207	2	201	15	-2.35849	-23.0483
W5-008	257.95	29.103	22.26	0.06183	0.00195	0.90064	0.0277	0.10566	0.00126	0.04493	0.00909	668	45	652	15	647	7	888	176	-0.766871	-3.14371
W5-009	175.4	10.4815	1.48	0.04912	0.00376	0.31943	0.02423	0.04717	0.00068	0.01507	0.00104	154	144	281	19	297	4	302	21	5.69395	92.8571
W5-010	163.89	14.9521	1.23	0.05765	0.00282	0.54796	0.02631	0.06895	0.00095	0.02212	0.00115	516	81	444	17	430	6	442	23	-3.15315	-16.6667
W5-011	450.56	246.777	2.31	0.14907	0.00413	8.55406	0.21743	0.41618	0.00456	0.11676	0.0012	2335	48	2292	23	2243	21	2232	22	-2.13787	-3.94004
W5-012	75.74	35.1398	1.53	0.12133	0.00302	5.92209	0.14424	0.35406	0.00453	0.10071	0.00461	1976	26	1964	21	1954	22	1939	85	-0.509165	-1.11336
W5-013	98.94	19.8529	1.34	0.07001	0.00247	1.49647	0.05168	0.15506	0.00197	0.04597	0.0022	929	50	929	21	929	11	908	43	0	0
W5-014	204.46	11.8019	1.58	0.05388	0.00359	0.34164	0.02242	0.046	0.00068	0.01458	0.00104	366	122	298	17	290	4	293	21	-2.68456	-20.765
W5-015	429.59	207.837	7.22	0.16383	0.00326	9.16208	0.17557	0.40567	0.00419	0.10121	0.0043	2496	19	2354	18	2195	19	1949	79	-6.75446	-12.0593
W5-016	343.59	12.9289	3.67	0.05195	0.00299	0.24186	0.0137	0.03377	0.00047	0.00901	0.00113	283	104	220	11	214	3	181	23	-2.72727	-24.3816
W5-017	329.73	37.5427	4.21	0.05941	0.00161	0.82577	0.02174	0.10082	0.00111	0.03362	0.00179	582	38	611	12	619	7	668	35	1.30933	6.35739
W5-018	171.99	15.0712	1.2	0.05513	0.0028	0.50537	0.0253	0.0665	0.00088	0.02052	0.00106	417	88	415	17	415	5	411	21	0	-0.479616
W5-019	289.45	51.3654	0.85	0.06566	0.00166	1.12948	0.02771	0.1248	0.00137	0.03661	0.0014	796	33	768	13	758	8	727	27	-1.30208	-4.77387
W5-020	1124.66	42.8234	3.47	0.05197	0.00277	0.22622	0.01178	0.03157	0.00035	0.00992	0.0001	284	125	207	10	200	2	199	2	-3.38164	-29.5775
W5-021	1359.97	112.91	15	0.05708	0.00126	0.6141	0.01306	0.07804	0.00081	0.02459	0.00147	495	29	486	8	484	5	491	29	-0.411523	-2.22222
W5-022	39.31	30.9736	0.61	0.16778	0.00432	11.2097	0.28743	0.48469	0.00718	0.12805	0.00537	2536	24	2541	24	2548	31	2435	96	0.275482	0.473186
W5-023	283.51	11.4735	2.14	0.05312	0.00315	0.24834	0.01452	0.03392	0.00046	0.0105	0.00083	334	108	225	12	215	3	211	17	-4.44444	-35.6287
W5-024	648.2	24.8904	1.37	0.04936	0.00181	0.20765	0.00744	0.03052	0.00035	0.00874	0.0004	165	62	192	6	194	2	176	8	1.04167	17.5758
W5-025	61.38	5.53632	2.04	0.05662	0.00583	0.58009	0.05925	0.07432	0.00127	0.0242	0.00302	477	199	465	38	462	8	483	60	-0.645161	-3.14465
W5-026	325.65	44.6063	1.19	0.06144	0.00172	0.90027	0.02452	0.10629	0.00122	0.02841	0.00119	655	39	652	13	651	7	566	23	-0.153374	-0.610687
W5-027	1035.4	106.996	4.39	0.05987	0.00135	0.76406	0.01666	0.09259	0.00097	0.0273	0.00118	599	29	576	10	571	6	544	23	-0.868056	-4.67446
W5-028	554.57	27.7031	1.27	0.05224	0.00203	0.2807	0.01064	0.03898	0.00048	0.01121	0.00053	296	64	251	8	247	3	225	11	-1.59363	-16.5541
W5-029	287.62	12.2648	0.93	0.04891	0.00356	0.20877	0.01499	0.03097	0.00046	0.00916	0.00051	144	133	193	13	197	3	184	10	2.07254	36.8056
W5-030	31.8	5.57196	1.58	0.07134	0.00679	1.34107	0.12628	0.13639	0.00292	0.04565	0.005	967	159	864	55	824	17	902	97	-4.62963	-14.788
W5-031	192.72	24.934	1.32	0.05966	0.00226	0.81887	0.03035	0.09958	0.00128	0.03112	0.00149	591	58	607	17	612	8	619	29	0.823723	3.5533
W5-032	1064.71	174.356	1.16	0.06615	0.00147	1.12959	0.02419	0.12389	0.0013	0.03614	0.0014	811	27	768	12	753	7	718	27	-1.95312	-7.15166
W5-033	236.15	19.602	2.17	0.0534	0.00213	0.52065	0.02034	0.07074	0.00086	0.0194	0.00118	346	66	426	14	441	5	388	23	3.52113	27.4566
W5-034	1211.68	45.2654	3.03	0.05184	0.00143	0.23332	0.00624	0.03266	0.00036	0.00999	0.00047	278	41	213	5	207	2	201	9	-2.8169	-25.5396
W5-035	720.74	40.536	1.94	0.05261	0.00152	0.33864	0.00953	0.0467	0.00052	0.01409	0.00063	312	44	296	7	294	3	283	13	-0.675676	-5.76923
W5-036	337.96	13.1304	1.65	0.05082	0.00273	0.22273	0.01177	0.0318	0.00044	0.00911	0.00058	233	97	204	10	202	3	183	12	-0.980392	-13.3047
W5-037	446.62	17.8359	3.13	0.05065	0.00221	0.24486	0.01051	0.03507	0.00043	0.0107	0.00079	225	77	222	9	222	3	215	16	0	-1.33333
W5-038	172.16	6.02059	2.39	0.05138	0.00636	0.21164	0.0258	0.02988	0.00074	0.00896	0.00146	258	229	195	22	190	5	180	29	-2.5641	-26.3566
W5-039	679.68	25.0405	1.33	0.05262	0.0022	0.20914	0.00852	0.02883	0.00039	0.00858	0.00044	312	68	193	7	183	2	173	9	-5.18135	-41.3462
W5-040	237.08	60.9798	0.91	0.07228	0.00185	1.66336	0.04144	0.16697	0.00188	0.06768	0.00276	994	32	995	16	995	10	1324	52	0	0.100604
W5-041	85.23	11.1791	1.26	0.06191	0.0038	0.84512	0.05117	0.09905	0.00152	0.03204	0.002	671	104	622	28	609	9	637	39	-2.09003	-9.23994
W5-042	537.81	19.1626	1.75	0.0557	0.00283	0.22022	0.0109	0.02869	0.00044	0.00941	0.0006	440	83	202	9	182	3	189	12	-9.90099	-58.6364
W5-043	370.86	2.93659	0.82	0.04755	0.0119	0.03621	0.00903	0.00553	0.00014	0.00167	0.0002	77	391	36	9	35.6	0.9	34	4	-1.11111	-53.7662
W5-044	1613.41	60.9237	1.52	0.05193	0.00152	0.21724	0.00616	0.03035	0.00035	0.00888	0.0004	282	44	200	5	193	2	179	8	-3.5	-31.5603
W5-045	256.41	17.1236	0.86	0.0545	0.0045	0.35849	0.02917	0.04773	0.00089	0.01363	0.00089	392	150	311	22	301	5	274	18	-3.21543	-23.2143
W5-046	148.87	24.6324	2.33	0.06685	0.00229	1.28676	0.04302	0.13966	0.00182	0.04033	0.00236	833	48	840	19	843	10	799	46	0.357143	1.20048
W5-047	276.34	40.1803	5.06	0.06524	0.00179	1.17436	0.03145	0.1306	0.00149	0.04	0.00238	782	37	789	15	791	8	793	46	0.253485	1.1509
W5-048	578.77	303.697	2.37	0.16122	0.00372	9.11464	0.20475	0.41022	0.00453	0.11606	0.00506	2468	23	2350	21	2216	21	2219	92	-5.70213	-10.2107
W5-049	193.82	22.8831	2.1	0.0602	0.00206	0.8185	0.0274	0.09865	0.0012	0.02932	0.0016	611	51	607	15	606	7	584	31	-0.164745	-0.818331
W5-050	178.61	16.1777	1.45	0.06079	0.0028	0.59185	0.02673	0.07064	0.00093	0.02241	0.00126	632	75	472	17	440	6	448	25	-6.77966	-30.3797
W5-051	262.8	65.5703	2.61	0.07947	0.00199	2.32618	0.05675	0.21241	0.00238	0.05711	0.00268	1184	31	1220	17	1242	13	1123	51	1.80328	4.89865
W5-052	409.85	180.892	2.79	0.15652	0.00372	7.58717	0.17563	0.35173	0.00387	0.10038	0.00453	2418	24	2183	21	1943	18	1933	83	-10.994	-19.6443
W5-053	307.03	46.3848	1.23	0.06501	0.0018	1.04655	0.02822	0.11681	0.00133	0.03225	0.00147	775	38	727	14	712	8	642	29	-2.06327	-8.12903
W5-054	125.55	54.2547	1.07	0.11219	0.00295	4.88222	0.12577	0.31577	0.00389	0.08423	0.0039	1835	29	1799	22	1769	19	1635	73	-1.66759	-3.59673
W5-055	288.29	11.08	2.44	0.04961	0.00318	0.22582	0.01429	0.03303	0.00047	0.00983	0.00088	177	118	207	12	209	3	198	18	0.966184	18.0791
W5-056	464.57	21.1132	1.11	0.05237	0.00217	0.24855	0.0101	0.03444	0.00042	0.01003	0.0005	302	70	225	8	218	3	202	10	-3.11111	-27.8146
W5-057	189.12	39.2591	1.08	0.07079	0.00221	1.52081	0.04633	0.15589	0.00195	0.04284	0.00208	951	42	939	19	934	11	848	40	-0.532481	-1.78759
W5-058	92.94	27.1717	3.72	0.09023	0.00321	3.07816	0.10775	0.24755	0.00373	0.09078	0.00689	1430	44	1427	27	1426	19	1756	128	-0.0700771	-0.27972
W5-059	191.11	2.76109	1.18	0.04959	0.01622	0.06845	0.02228	0.01001	0.00034	0.00446	0.00063	176	506	67	21	64	2	90	13	-4.47761	-63.6364
W5-060	206.06	36.0478	1.27	0.06629	0.00204	1.20552	0.03631	0.13197	0.00158	0.04233	0.00204	816	43	803	17	799	9	838	40	-0.498132	-2.08333
W5-061	189.08	21.487	1.92	0.0632	0.00233	0.8115	0.02921	0.09318	0.00119	0.02863	0.00163	715	55	603	16	574	7	571	32	-4.80929	-19.7203
W5-062	640.52	97.3	2.28	0.06532	0.00174	1.15628	0.03006	0.12846	0.00146	0.03635	0.00175	785	36	780	14	779	8	722	34	-0.128205	-0.764331
W5-063	521.82	372.537	0.62	0.16425	0.00404	9.98542	0.23938	0.44115	0.00483	0.11733	0.00534	2500	26	2433	22	2356	22	2242	97	-3.16482	-5.76
W5-064	318.58	18.7224	2.24	0.05384	0.00219	0.3694	0.01471	0.04979	0.00064	0.01488	0.00092	364	66	319	11	313	4	299	18	-1.88088	-14.011
W5-065	456.19	25.0459	2.39	0.05139	0.00189	0.33053	0.01191	0.04668	0.00057	0.01469	0.00083	258	60	290	9	294	4	295	17	1.37931	13.9535
W5-066	334.39	55.1005	4.9	0.06905	0.00193	1.4084	0.03843	0.14801	0.00172	0.04197	0.00247	900	37	892	16	890	10	831	48	-0.224215	-1.11111
W5-067	293.38	17.2366	1.32	0.05191	0.00267	0.33002	0.01666	0.04614	0.00065	0.01334	0.00082	281	90	290	13	291	4	268	16	0.344828	3.55872
W5-068	518.15	60.0875	3.18	0.06455	0.00184	0.87575	0.02438	0.09845	0.00114	0.03787	0.00195	760	39	639	13	605	7	751	38	-5.32081	-20.3947
W5-069	875.17	17.0246	1.74	0.04884	0.00237	0.10616	0.00505	0.01577	0.00021	0.00511	0.00031	140	84	102	5	101	1	103	6	-0.980392	-27.8571
W5-070	290.28	45.321	1.65	0.06479	0.00204	1.12627	0.03458	0.12616	0.00157	0.03636	0.00193	768	44	766	17	766	9	722	38	0	-0.260417
W5-071	333.39	156.39	1.61	0.12324	0.00328	6.19952	0.16161	0.36506	0.00425	0.09553	0.00474	2004	30	2004	23	2006	20	1844	87	0.0998004	0.0998004
W5-072	207.47	11.2091	2.07	0.05589	0.00477	0.33988	0.02856	0.04413	0.00086	0.01567	0.00157	448	153	297	22	278	5	314	31	-6.39731	-37.9464
W5-073	518.95	41.4116	3.25	0.05618	0.00179	0.5421	0.0169	0.07003	0.00085	0.02145	0.00124	459	47	440	11	436	5	429	25	-0.909091	-5.01089
W5-074	273.86	20.4325	2.72	0.05512	0.00249	0.48884	0.02165	0.06437	0.00088	0.01986	0.00146	417	74	404	15	402	5	397	29	-0.49505	-3.59712
W5-075	3745.67	659.646	0.649665	0.44642	0.03146	3.81625	0.23097	0.06204	0.00252	0.05082	0.00399	4073.3	101.05	388	15.32	1596.2	48.69	1001.9	76.71	311.392	-60.8131
W5-076	389.29	20.684	1.33	0.0521	0.00219	0.30146	0.01246	0.04199	0.00054	0.01185	0.00068	290	71	268	10	265	3	238	14	-1.1194	-8.62069
W5-077	289.66	32.3283	3.4	0.06157	0.00224	0.8337	0.02966	0.09827	0.00131	0.02872	0.00196	659	53	616	16	604	8	572	39	-1.94805	-8.34598
W5-078	237.83	12.2349	1.78	0.05009	0.00412	0.29119	0.02347	0.04219	0.00088	0.01295	0.00123	199	143	259	18	266	5	260	25	2.7027	33.6683
W5-079	657.37	32.2713	1.94	0.05146	0.00231	0.28474	0.01249	0.04016	0.00056	0.01355	0.00085	261	75	254	10	254	3	272	17	0	-2.68199
W5-080	706.1	26.8315	2.28	0.05001	0.00213	0.22427	0.00935	0.03254	0.00043	0.00937	0.00061	195	72	205	8	206	3	189	12	0.487805	5.64103
W5-081	296.71	86.1526	1.29	0.0854	0.00253	2.62292	0.07607	0.2229	0.00273	0.06171	0.0033	1325	37	1307	21	1297	14	1210	63	-0.765111	-2.11321
W5-082	<0.39		#VALUE!	-18.6456	406.105	65.9052	66.2702	-0.02565	0.55844	-6.08095	7.97632	0.1	7999.9	-167.5	3694.72	4267.9	1005.74	-NaN	*******	-2648	4.2678e+06
W5-083	117.65	51.3247	1.19	0.11044	0.00342	4.89625	0.14932	0.32176	0.00428	0.09152	0.00508	1807	36	1802	26	1798	21	1770	94	-0.221976	-0.498063
W5-084	68.33	11.0466	1.14	0.06729	0.00401	1.12235	0.06567	0.12105	0.00218	0.03589	0.00258	847	92	764	31	737	13	713	50	-3.53403	-12.987
W5-085	629.85	35.2756	1.77	0.05156	0.00196	0.3292	0.01226	0.04634	0.0006	0.01322	0.00078	266	62	289	9	292	4	265	16	1.03806	9.77444
W5-086	446.87	26.6423	1.84	0.05416	0.00218	0.36376	0.01432	0.04875	0.00065	0.01547	0.00095	378	64	315	11	307	4	310	19	-2.53968	-18.7831
W5-087	1048.63	40.4868	1.8	0.05238	0.0018	0.23005	0.00777	0.03188	0.0004	0.00939	0.00055	302	54	210	6	202	2	189	11	-3.80952	-33.1126
W5-088	266.34	26.5286	1.25	0.05512	0.0027	0.57426	0.02759	0.07562	0.00114	0.0242	0.00155	417	80	461	18	470	7	483	31	1.95228	12.7098
W5-089	361.98	30.0172	2.31	0.05565	0.00218	0.53958	0.02069	0.07037	0.00094	0.02116	0.00137	438	61	438	14	438	6	423	27	0	0
W5-090	123.26	6.60887	1.56	0.05508	0.00447	0.32853	0.02629	0.04329	0.0008	0.0125	0.00115	415	147	288	20	273	5	251	23	-5.20833	-34.2169
W5-091	662.34	59.7675	1.81	0.0566	0.0019	0.58114	0.01917	0.07451	0.00093	0.02147	0.00126	476	51	465	12	463	6	429	25	-0.430108	-2.73109
W5-092	379.78	15.9518	1.65	0.04982	0.00279	0.23338	0.01285	0.034	0.0005	0.01051	0.00075	187	99	213	11	216	3	211	15	1.40845	15.508
W5-093	479.54	22.1391	1.37	0.05256	0.00237	0.2644	0.01169	0.03651	0.00051	0.01059	0.00068	310	75	238	9	231	3	213	14	-2.94118	-25.4839
W5-094	330.86	34.4089	0.7	0.05584	0.00232	0.53293	0.02172	0.06926	0.00096	0.02029	0.0012	446	66	434	14	432	6	406	24	-0.460829	-3.13901
W5-095	416.41	138.628	1.32	0.09061	0.00284	3.18815	0.09833	0.25536	0.00317	0.07099	0.0041	1438	40	1454	24	1466	16	1386	77	0.825309	1.94715
W5-096	559.34	20.4595	3.58	0.05089	0.00224	0.22609	0.00977	0.03224	0.00044	0.01105	0.00082	236	74	207	8	205	3	222	16	-0.966184	-13.1356
W5-097	141.88	28.2417	1.24	0.06974	0.00277	1.44765	0.05651	0.15066	0.00216	0.04598	0.00292	921	57	909	23	905	12	909	56	-0.440044	-1.73724
W5-098	432.29	125.111	4.32	0.09349	0.00299	3.2657	0.10296	0.25352	0.00317	0.06839	0.00425	1498	41	1473	25	1457	16	1337	80	-1.08622	-2.73698
W5-099	281.42	66.1298	0.79	0.07288	0.00253	1.61606	0.05511	0.16093	0.00212	0.0467	0.0028	1011	48	976	21	962	12	923	54	-1.43443	-4.84669
W5-100	308.56	66.0919	1.08	0.07548	0.00279	1.67358	0.06086	0.16094	0.00223	0.04346	0.00271	1081	51	999	23	962	12	860	52	-3.7037	-11.0083
W5-101	681.82	6.68533	0.57	0.04746	0.00544	0.03981	0.00452	0.00609	0.00011	0.00181	0.00013	72	217	40	4	39.1	0.7	37	3	-2.25	-45.6944
W5-102	282.12	23.2238	3.98	0.05607	0.00242	0.57292	0.02431	0.07416	0.00105	0.02051	0.00173	455	69	460	16	461	6	410	34	0.217391	1.31868
W5-103	206.68	10.897	2.37	0.0572	0.00367	0.35577	0.02238	0.04514	0.00079	0.01285	0.0013	499	108	309	17	285	5	258	26	-7.76699	-42.8858
W5-104	594.2	23.0791	4.47	0.05294	0.0024	0.25903	0.01156	0.03552	0.0005	0.00916	0.00093	326	76	234	9	225	3	184	19	-3.84615	-30.9816
W5-105	357.94	17.3124	1.95	0.05362	0.00264	0.29972	0.0145	0.04057	0.00059	0.01145	0.00085	355	83	266	11	256	4	230	17	-3.7594	-27.8873
W5-106	209.87	135.011	1.36	0.17377	0.00573	11.2389	0.36629	0.46943	0.00617	0.1225	0.00759	2594	37	2543	30	2481	27	2336	137	-2.43807	-4.35621
W5-107	431.89	17.4007	3.82	0.0517	0.00249	0.257	0.01217	0.03608	0.00051	0.01101	0.00098	272	83	232	10	228	3	221	20	-1.72414	-16.1765
W5-108	378.63	33.4121	1.38	0.05558	0.00223	0.53372	0.02111	0.06969	0.00095	0.02017	0.00133	436	64	434	14	434	6	404	26	0	-0.458716
W5-109	177.45	25.5656	1.72	0.0652	0.00281	1.05314	0.04462	0.11723	0.00171	0.03382	0.00241	781	64	730	22	715	10	672	47	-2.05479	-8.4507
W5-110	779.84	82.6582	6.74	0.05942	0.0021	0.80279	0.02792	0.09806	0.00126	0.02696	0.00189	583	53	598	16	603	7	538	37	0.83612	3.43053
W5-111	178.53	14.565	2.35	0.05684	0.00302	0.54347	0.02849	0.0694	0.00107	0.02081	0.00175	485	89	441	19	433	6	416	35	-1.81406	-10.7216

## Sheet: WHSL-6
			238U/232Th	Pb207/Pb206		Pb207/U235		Pb206/U238		Pb208/Th232		Pb207/Pb206		Pb207/U235		Pb206/U238		Pb208/Th232		Δ68-75(%)	Δ68-76(%)
Grain	U [ppm]	Pb [ppm]	Ratio	Ratio	2σ	Ratio	2σ	Ratio	2σ	Ratio	2σ	Age	2σ	Age	2σ	Age	2σ	Age	2σ
W6-001	474.66	198.895	10.59	0.13264	0.00226	6.75396	0.10863	0.369	0.00367	0.09779	0.00341	2133	15	2080	14	2025	17	1886	63	-2.64423	-5.06329
W6-002	141.82	23.6278	1.32	0.06608	0.002	1.18591	0.0347	0.13005	0.00159	0.03751	0.00138	809	41	794	16	788	9	744	27	-0.755668	-2.5958
W6-003	370.49	14.5886	2.92	0.05024	0.00213	0.23839	0.00987	0.03439	0.00043	0.01108	0.00066	206	73	217	8	218	3	223	13	0.460829	5.82524
W6-004	215.45	59.6721	1.28145	0.09799	0.00187	2.8299	0.05114	0.20929	0.0022	0.06099	0.00174	1586.2	35.17	1225	11.71	1363.5	13.56	1196.6	33.05	11.3061	-14.0398
W6-005	364.11	17.0223	2.04	0.05182	0.00208	0.27844	0.01087	0.03894	0.00048	0.01266	0.00059	277	67	249	9	246	3	254	12	-1.20482	-11.1913
W6-006	354.86	54.5839	1.92	0.0666	0.00143	1.17105	0.02403	0.12744	0.00136	0.03714	0.00118	825	25	787	11	773	8	737	23	-1.77891	-6.30303
W6-007	424.15	22.39	2.99	0.05414	0.00168	0.34593	0.01036	0.04631	0.00054	0.01425	0.00068	377	46	302	8	292	3	286	14	-3.31126	-22.5464
W6-008	252.42	9.86972	2.73	0.05439	0.00296	0.25855	0.0138	0.03445	0.00048	0.00927	0.00084	387	95	233	11	218	3	187	17	-6.43777	-43.6693
W6-009	352.7	14.1477	3.26	0.05337	0.00223	0.26187	0.01066	0.03556	0.00045	0.01075	0.00075	345	69	236	9	225	3	216	15	-4.66102	-34.7826
W6-010	184.93	36.2956	2.01	0.07261	0.00173	1.63459	0.03732	0.16315	0.00185	0.04703	0.0017	1003	28	984	14	974	10	929	33	-1.01626	-2.89133
W6-011	273.96	10.9207	2.67	0.05282	0.00265	0.25643	0.01262	0.03519	0.00047	0.00924	0.00075	321	88	232	10	223	3	186	15	-3.87931	-30.5296
W6-012	145.52	12.5741	1.74	0.05493	0.00243	0.5352	0.02319	0.07063	0.00094	0.02202	0.00112	409	73	435	15	440	6	440	22	1.14943	7.57946
W6-013	521.35	29.3683	2.76	0.05412	0.00149	0.36708	0.00975	0.04916	0.00055	0.01482	0.00062	376	40	317	7	309	3	297	12	-2.52366	-17.8191
W6-014	588.57	31.4734	3.05	0.05573	0.00165	0.36299	0.01034	0.04722	0.00056	0.01379	0.00066	442	42	314	8	297	3	277	13	-5.41401	-32.8054
W6-015	700.47	39.4028	1.14	0.05516	0.00171	0.32981	0.00983	0.04334	0.00051	0.01225	0.00044	419	45	289	8	274	3	246	9	-5.19031	-34.6062
W6-016	308.6	3.5474	1.9	0.04893	0.00723	0.06531	0.00955	0.00967	0.00022	0.00282	0.00043	144	262	64	9	62	1	57	9	-3.125	-56.9444
W6-017	465.87	24.0643	1.51	0.0518	0.00174	0.29946	0.00977	0.0419	0.00049	0.01212	0.00047	277	53	266	8	265	3	243	9	-0.37594	-4.33213
W6-018	290.66	48.4803	2.35	0.07086	0.00166	1.36564	0.03065	0.13971	0.00158	0.04536	0.00165	953	28	874	13	843	9	897	32	-3.54691	-11.5425
W6-019	215.21	79.0259	1.93	0.1075	0.00217	4.41384	0.08556	0.29765	0.00337	0.08045	0.00272	1757	20	1715	16	1680	17	1564	51	-2.04082	-4.38247
W6-020	380.83	19.6499	1.19	0.05374	0.00228	0.29488	0.01219	0.03978	0.00052	0.01178	0.0005	360	70	262	10	251	3	237	10	-4.19847	-30.2778
W6-021	436.81	26.7095	1.69	0.05433	0.00163	0.37783	0.01094	0.05041	0.00058	0.01474	0.00057	385	44	325	8	317	4	296	11	-2.46154	-17.6623
W6-022	599.31	32.8226	1.97	0.05501	0.00149	0.3495	0.00914	0.04606	0.00051	0.01364	0.00051	413	39	304	7	290	3	274	10	-4.60526	-29.7821
W6-023	733.94	8.06843	1.8	0.04932	0.00383	0.06226	0.00476	0.00915	0.00015	0.00275	0.00021	163	142	61	5	58.7	1	56	4	-3.77049	-63.9877
W6-024	604.08	59.0341	1.17	0.0545	0.00126	0.56951	0.01255	0.07576	0.00081	0.02154	0.00067	392	30	458	8	471	5	431	13	2.83843	20.1531
W6-025	382.89	15.2212	2.2	0.05125	0.00207	0.24241	0.00953	0.03429	0.00043	0.00957	0.00053	252	67	220	8	217	3	193	11	-1.36364	-13.8889
W6-026	350.16	146.525	3.22	0.12158	0.00223	5.89051	0.1028	0.35126	0.00364	0.10142	0.00322	1980	17	1960	15	1941	17	1953	59	-0.969388	-1.9697
W6-027	461.77	17.9802	2.31	0.05022	0.00191	0.23295	0.00862	0.03363	0.00041	0.00986	0.00051	205	63	213	7	213	3	198	10	0	3.90244
W6-028	390.35	13.8993	4.6	0.05284	0.0023	0.23848	0.01013	0.03272	0.00042	0.00907	0.00093	322	73	217	8	208	3	182	19	-4.14747	-35.4037
W6-029	115.6	#VALUE!	0.64	0.0628	0.00266	0.81874	0.03385	0.09452	0.00133	0.0266	0.00102	701	64	607	19	582	8	531	20	-4.11862	-16.9757
W6-030	138.7	25.4884	2.69	0.07031	0.00192	1.53178	0.0404	0.15796	0.0019	0.04807	0.00221	937	34	943	16	945	11	949	43	0.212089	0.853789
W6-031	326.36	12.8094	2.8	0.04863	0.00233	0.23063	0.01081	0.03439	0.00045	0.01101	0.00073	130	83	211	9	218	3	221	15	3.31754	67.6923
W6-032	175.53	15.4858	2	0.05653	0.00228	0.57369	0.02257	0.07358	0.00096	0.02356	0.00117	473	64	460	15	458	6	471	23	-0.434783	-3.17125
W6-033	285.55	18.1279	1.23	0.0533	0.00211	0.35792	0.01377	0.04869	0.00062	0.01562	0.00064	342	64	311	10	306	4	313	13	-1.60772	-10.5263
W6-034	285.41	12.3567	2.96	0.05213	0.00249	0.27631	0.01291	0.03843	0.00052	0.01111	0.00087	291	82	248	10	243	3	223	17	-2.01613	-16.4948
W6-035	438.17	123.696	2.17	0.08602	0.00169	2.79288	0.05228	0.23545	0.00247	0.0676	0.00221	1339	20	1354	14	1363	13	1322	42	0.664697	1.79238
W6-036	366.59	63.0163	7.28	0.07199	0.00155	1.56751	0.03231	0.1579	0.00171	0.05035	0.00238	986	25	957	13	945	10	993	46	-1.25392	-4.15822
W6-037	516.93	27.7606	2.89	0.05412	0.0016	0.353	0.01007	0.0473	0.00055	0.01427	0.00067	376	43	307	8	298	3	286	13	-2.9316	-20.7447
W6-038	288.12	74.7236	1.28872	0.08967	0.00195	2.473	0.05154	0.19999	0.00225	0.05668	0.00194	1418.4	41.03	1175.3	12.08	1264.2	15.07	1114.3	37.15	7.56403	-10.8714
W6-039	260.74	21.2918	2.72	0.05683	0.00188	0.55854	0.01788	0.07128	0.00087	0.02165	0.00113	485	49	451	12	444	5	433	22	-1.55211	-8.45361
W6-040	219.11	11.4024	4.46	0.05046	0.00248	0.33635	0.01617	0.04834	0.00065	0.01152	0.00148	216	86	294	12	304	4	232	30	3.40136	40.7407
W6-041	796.45	45.8329	1.8	0.05263	0.00136	0.34418	0.00854	0.04743	0.00052	0.0153	0.00057	313	37	300	6	299	3	307	11	-0.333333	-4.47284
W6-042	159.04	12.5342	2.41	0.05702	0.00257	0.52832	0.02323	0.0672	0.00092	0.02228	0.00141	492	73	431	15	419	6	445	28	-2.78422	-14.8374
W6-043	413.54	32.538	2.19	0.05619	0.0016	0.51935	0.01424	0.06704	0.00077	0.02052	0.00087	460	40	425	10	418	5	411	17	-1.64706	-9.13043
W6-044	135.79	6.99605	3.21	0.05312	0.00438	0.33832	0.02751	0.04619	0.00082	0.01311	0.002	334	153	296	21	291	5	263	40	-1.68919	-12.8743
W6-045	364.07	14.8284	2.03	0.0521	0.00223	0.24847	0.0104	0.03459	0.00044	0.01034	0.00056	290	72	225	8	219	3	208	11	-2.66667	-24.4828
W6-046	138.3	96.8715	0.95	0.16438	0.00336	10.9588	0.21582	0.48356	0.00548	0.13475	0.00465	2501	18	2520	18	2543	24	2555	83	0.912698	1.67933
W6-047	309.69	19.1044	1.4	0.0542	0.00203	0.36884	0.01347	0.04936	0.00062	0.01472	0.00066	379	59	319	10	311	4	295	13	-2.50784	-17.942
W6-048	407.99	90.871	1.07	0.07371	0.00162	1.70092	0.03578	0.16738	0.00183	0.04823	0.00169	1034	25	1009	13	998	10	952	33	-1.09019	-3.48162
W6-049	452.56	16.8	3.97	0.05059	0.00198	0.2344	0.00895	0.0336	0.00042	0.01087	0.00075	222	65	214	7	213	3	219	15	-0.46729	-4.05405
W6-050	349.34	80.4514	1.09	0.07433	0.00167	1.76858	0.03798	0.17258	0.00191	0.05142	0.00183	1050	26	1034	14	1026	11	1013	35	-0.773694	-2.28571
W6-051	223.63	24.5868	2.03	0.05982	0.00193	0.76541	0.02399	0.09282	0.00116	0.02779	0.00134	597	46	577	14	572	7	554	26	-0.866551	-4.1876
W6-052	281.8	12.6386	2.04	0.05202	0.0026	0.27034	0.01321	0.0377	0.00052	0.01233	0.00074	286	87	243	11	239	3	248	15	-1.64609	-16.4336
W6-053	573.16	20.5087	5.01	0.05239	0.00199	0.23688	0.00873	0.0328	0.00043	0.01114	0.00084	302	60	216	7	208	3	224	17	-3.7037	-31.1258
W6-054	267.28	13.7518	3.09	0.05181	0.00227	0.32596	0.01392	0.04564	0.00061	0.01447	0.001	277	73	286	11	288	4	290	20	0.699301	3.97112
W6-055	624.03	24.043	2.97	0.0514	0.00171	0.24185	0.00779	0.03413	0.00041	0.01058	0.00056	259	52	220	6	216	3	213	11	-1.81818	-16.6023
W6-056	798.6	8.90477	2.76	0.04771	0.00299	0.06486	0.00399	0.00986	0.00014	0.00299	0.00027	85	110	64	4	63.3	0.9	60	5	-1.09375	-25.5294
W6-057	298.61	27.4062	1.62	0.05621	0.00176	0.58047	0.01761	0.07491	0.00091	0.02317	0.00102	461	46	465	11	466	5	463	20	0.215054	1.0846
W6-058	469.86	22.3231	12.95	0.05322	0.00172	0.33471	0.01049	0.04562	0.00055	0.01242	0.00188	338	49	293	8	288	3	249	38	-1.70648	-14.7929
W6-059	649.86	27.4008	1.88	0.05081	0.00163	0.24792	0.00772	0.0354	0.00042	0.01091	0.00049	232	50	225	6	224	3	219	10	-0.444444	-3.44828
W6-060	748.47	110.117	2.8	0.06612	0.00149	1.16287	0.02514	0.12759	0.00139	0.04064	0.0016	810	27	783	12	774	8	805	31	-1.14943	-4.44444
W6-061	195.66	11.0321	1.3	0.0497	0.00281	0.30558	0.01694	0.04461	0.00065	0.01368	0.00077	181	100	271	13	281	4	275	15	3.69004	55.2486
W6-062	300.47	14.1753	2.72	0.05294	0.00236	0.3019	0.01309	0.04137	0.00057	0.01303	0.00089	326	73	268	10	261	4	262	18	-2.61194	-19.9387
W6-063	382.46	30.1084	1.1	0.05262	0.00173	0.43271	0.01378	0.05967	0.00073	0.01868	0.0008	312	50	365	10	374	4	374	16	2.46575	19.8718
W6-064	282.58	101.851	2.07718	0.1136	0.00262	4.57565	0.10178	0.29224	0.00339	0.08741	0.00364	1857.8	41.17	1652.7	16.93	1744.8	18.53	1693.8	67.64	5.5727	-6.08246
W6-065	488.54	398.732	6.99	0.25126	0.00545	22.28	0.46417	0.6434	0.00703	0.18683	0.00766	3193	19	3196	20	3202	28	3462	130	0.187735	0.281867
W6-066	191.52	111.58	1.98	0.16131	0.00365	10.1548	0.2215	0.45679	0.00529	0.12409	0.00516	2469	22	2449	20	2425	23	2364	93	-0.979992	-1.7821
W6-067	391.75	15.1066	3.62	0.05042	0.0022	0.24284	0.01033	0.03495	0.00046	0.01064	0.00085	214	74	221	8	221	3	214	17	0	3.27103
W6-068	763.57	231.63	2.2	0.09788	0.00222	3.41276	0.0744	0.253	0.00281	0.07101	0.00291	1584	24	1507	17	1454	14	1387	55	-3.51692	-8.20707
W6-069	700.88	39.1989	1.77	0.05043	0.00153	0.32344	0.00949	0.04654	0.00055	0.01462	0.00066	215	46	285	7	293	3	293	13	2.80702	36.2791
W6-070	565.8	22.1559	3.18	0.04954	0.00184	0.23721	0.00856	0.03475	0.00044	0.01188	0.00069	173	60	216	7	220	3	239	14	1.85185	27.1676
W6-071	369.77	15.1874	1.45	0.05362	0.00214	0.24265	0.00943	0.03284	0.00044	0.01059	0.00055	355	63	221	8	208	3	213	11	-5.88235	-41.4085
W6-072	990.87	30.5359	17.39	0.05223	0.00181	0.21488	0.00719	0.02985	0.00039	0.00794	0.00123	295	52	198	6	190	2	160	25	-4.0404	-35.5932
W6-073	313.54	43.893	1.25	0.05992	0.0017	0.89509	0.0245	0.10841	0.00131	0.03441	0.00153	601	38	649	13	664	8	684	30	2.31125	10.4825
W6-074	609.7	22.2761	1.83	0.05231	0.00213	0.21985	0.00864	0.0305	0.00043	0.00969	0.00055	299	64	202	7	194	3	195	11	-3.9604	-35.1171
W6-075	338.42	13.3396	1.43	0.05063	0.00237	0.22355	0.01021	0.03204	0.00045	0.00944	0.00053	224	80	205	8	203	3	190	11	-0.97561	-9.375
W6-076	258.81	16.8154	1.36	0.05347	0.00221	0.38535	0.01553	0.0523	0.00071	0.01534	0.00083	349	66	331	11	329	4	308	17	-0.60423	-5.73066
W6-077	313.34	12.7162	2.91	0.05203	0.00243	0.25538	0.01164	0.03562	0.0005	0.01229	0.00087	287	78	231	9	226	3	247	17	-2.1645	-21.2544
W6-078	288.47	26.7775	1.34	0.05464	0.00186	0.5587	0.01847	0.07421	0.00095	0.02216	0.00109	398	51	451	12	461	6	443	22	2.21729	15.8291
W6-079	238.74	35.1277	3.05	0.0653	0.00191	1.16373	0.0329	0.12934	0.00161	0.04087	0.00216	784	38	784	15	784	9	810	42	0	0
W6-080	685	29.3546	2.42	0.05195	0.00169	0.26971	0.00849	0.03768	0.00047	0.01065	0.00057	283	49	242	7	238	3	214	11	-1.65289	-15.9011
W6-081	1470.05	65.9265	1.08	0.05322	0.00154	0.24995	0.00697	0.03409	0.00041	0.01062	0.0005	338	41	227	6	216	3	214	10	-4.84581	-36.0947
W6-082	306.46	25.372	2.6	0.05751	0.00203	0.56629	0.01942	0.07147	0.00094	0.02467	0.00141	511	52	456	13	445	6	493	28	-2.41228	-12.9159
W6-083	545.56	22.7871	2.87	0.04943	0.00181	0.251	0.0089	0.03686	0.00048	0.01232	0.00072	168	58	227	7	233	3	247	14	2.64317	38.6905
W6-084	117.81	9.82779	2.32	0.05861	0.00314	0.57093	0.02994	0.0707	0.0011	0.02495	0.00188	553	87	459	19	440	7	498	37	-4.13943	-20.434
W6-085	160.47	4.75083	1.86	0.04809	0.00504	0.16573	0.01716	0.02502	0.00047	0.00778	0.00086	104	196	156	15	159	3	157	17	1.92308	52.8846
W6-086	402.53	13.3445	1.24	0.04603	0.00245	0.16211	0.00846	0.02557	0.00037	0.00882	0.0005		84	153	7	163	2	177	10	6.53595	#DIV/0!
W6-087	237.86	30.0179	1.57	0.06102	0.00198	0.86409	0.0271	0.1028	0.00134	0.03179	0.00166	640	45	632	15	631	8	633	33	-0.158228	-1.40625
W6-088	249.92	14.5118	2.72	0.05364	0.00247	0.37622	0.01683	0.05091	0.00077	0.01663	0.00121	356	74	324	12	320	5	333	24	-1.23457	-10.1124
W6-089	183.2	16.2368	1.49	0.05305	0.00235	0.52277	0.02265	0.07154	0.00102	0.02298	0.00133	331	72	427	15	445	6	459	26	4.21546	34.4411
W6-090	319.17	37.1891	1.13	0.05856	0.00187	0.71979	0.02223	0.08923	0.00114	0.02766	0.0014	551	45	551	13	551	7	551	28	0	0
W6-091	439.08	25.9955	1.89	0.05365	0.0019	0.36889	0.01269	0.04992	0.00065	0.0156	0.00087	356	54	319	9	314	4	313	17	-1.5674	-11.7978
W6-092	117.44	4.62143	3.34	0.05278	0.00513	0.25422	0.0244	0.03496	0.00067	0.01255	0.00183	319	182	230	20	222	4	252	37	-3.47826	-30.4075
W6-093	346.44	21.5806	2.16	0.05199	0.00195	0.37651	0.01376	0.05258	0.0007	0.01886	0.00109	285	59	324	10	330	4	378	22	1.85185	15.7895
W6-094	1346.33	3.97012	0.93	0.04358	0.00608	0.01302	0.0018	0.00217	5e-05	0.00069	6e-05	-92	207	13	2	14	0.3	14	1	7.69231	-115.217
W6-095	449.94	18.665	1.39	0.05116	0.00214	0.23658	0.00964	0.03357	0.00046	0.01009	0.00058	248	68	216	8	213	3	203	12	-1.38889	-14.1129
W6-096	485.59	20.2187	2.63	0.05192	0.00201	0.25961	0.00977	0.03631	0.00049	0.01239	0.00077	282	61	234	8	230	3	249	15	-1.7094	-18.4397
W6-097	183.8	9.91601	1.07	0.0503	0.00317	0.28615	0.01771	0.0413	0.00065	0.01265	0.00081	209	113	256	14	261	4	254	16	1.95312	24.8804
W6-098	1423.8	55.0275	3.77	0.04992	0.00152	0.24157	0.0071	0.03513	0.00044	0.01152	0.00065	191	45	220	6	223	3	232	13	1.36364	16.7539
W6-099	371.45	15.1329	2.12	0.05159	0.00224	0.25123	0.01063	0.03536	0.0005	0.01019	0.00069	267	71	228	9	224	3	205	14	-1.75439	-16.1049
W6-100	672.66	27.326	2.75	0.05143	0.00182	0.25381	0.00873	0.03583	0.00047	0.01167	0.00071	260	55	230	7	227	3	235	14	-1.30435	-12.6923

## Sheet: WHSL-7
			238U/232Th	Pb207/Pb206		Pb207/U235		Pb206/U238		Pb208/Th232		Pb207/Pb206		Pb207/U235		Pb206/U238		Pb208/Th232		Δ68-75(%)	Δ68-76(%)
Grain	U [ppm]	Pb [ppm]	Ratio	Ratio	2σ	Ratio	2σ	Ratio	2σ	Ratio	2σ	Age	2σ	Age	2σ	Age	2σ	Age	2σ
W7-001	49.65	10.0323	1.37	0.07206	0.00359	1.56053	0.07624	0.15703	0.00258	0.05319	0.003	988	73	955	30	940	14	1047	58	-1.57068	-4.8583
W7-002	90.6	18.4584	0.56	0.06645	0.00265	1.19733	0.04668	0.13065	0.00185	0.03734	0.00141	821	58	799	22	792	11	741	27	-0.876095	-3.53228
W7-003	1080.59	85.0673	1.70488	0.0863	0.00182	0.7244	0.0146	0.06087	0.00066	0.0132	0.00044	1344.8	40.3	380.9	4.03	553.3	8.59	265.1	8.8	45.2612	-58.8563
W7-004	221.3	16.9856	1.74	0.05226	0.0023	0.47158	0.02029	0.06543	0.00087	0.02084	0.00104	297	74	392	14	409	5	417	21	4.33673	37.7104
W7-005	241.85	9.73659	1.83	0.04643	0.00316	0.21494	0.0144	0.03357	0.0005	0.0119	0.00075	20	117	198	12	213	3	239	15	7.57576	965
W7-006	608.65	115.904	2.9	0.07596	0.00147	1.74309	0.03223	0.16639	0.00175	0.05198	0.00177	1094	21	1025	12	992	10	1024	34	-3.21951	-9.32358
W7-007	176.63	16.6959	0.73	0.05371	0.00256	0.4938	0.02311	0.06667	0.00092	0.02003	0.00081	359	81	407	16	416	6	401	16	2.2113	15.8774
W7-008	445.58	22.6285	1.53	0.04901	0.00181	0.28298	0.01016	0.04187	0.00051	0.0128	0.00056	148	61	253	8	264	3	257	11	4.34783	78.3784
W7-009	634.98	25.5591	2.12	0.05022	0.00172	0.23659	0.00786	0.03416	0.00041	0.0112	0.00051	205	55	216	6	217	3	225	10	0.462963	5.85366
W7-010	109.31	43.2221	1.55	0.10511	0.00236	4.46878	0.09768	0.30828	0.00379	0.09559	0.00361	1716	23	1725	18	1732	19	1845	67	0.405797	0.932401
W7-011	316.87	211.01	2.28	0.18509	0.00333	13.5115	0.23407	0.52933	0.00564	0.14601	0.00479	2699	15	2716	16	2739	24	2755	84	0.846834	1.48203
W7-012	471	98.7315	1.55	0.07052	0.00143	1.63525	0.03178	0.16814	0.0018	0.05207	0.00172	944	23	984	12	1002	10	1026	33	1.82927	6.14407
W7-013	376.04	19.3017	1.43	0.04904	0.00199	0.28365	0.01126	0.04194	0.00053	0.01422	0.00062	150	69	254	9	265	3	285	12	4.33071	76.6667
W7-014	482.85	17.1947	5.17	0.05213	0.00214	0.23567	0.00946	0.03278	0.00042	0.00979	0.00129	291	68	215	8	208	3	197	26	-3.25581	-28.5223
W7-015	371.33	29.0449	1.78808	0.15145	0.00333	1.64027	0.03411	0.07854	0.00093	0.05191	0.00179	2362.3	37.06	487.4	5.55	985.8	13.12	1022.9	34.33	102.257	-58.2695
W7-016	733.5	77.0893	1.56	0.05868	0.00131	0.69182	0.01487	0.08549	0.00093	0.02599	0.0009	555	28	534	9	529	6	519	18	-0.93633	-4.68468
W7-017	444.98	22.1609	2.19	0.05196	0.00191	0.30523	0.01095	0.04259	0.00053	0.01341	0.00068	284	59	270	9	269	3	269	14	-0.37037	-5.28169
W7-018	202.33	16.5962	1.93	0.05531	0.00228	0.52623	0.02119	0.06899	0.00092	0.02121	0.00116	425	66	429	14	430	6	424	23	0.2331	1.17647
W7-019	392.35	21.4568	2.67	0.05041	0.00182	0.3359	0.01185	0.04832	0.00059	0.01527	0.00081	214	59	294	9	304	4	306	16	3.40136	42.0561
W7-020	200.24	14.0389	2.62	0.05785	0.00239	0.48564	0.01958	0.06088	0.00082	0.02034	0.00131	524	65	402	13	381	5	407	26	-5.22388	-27.2901
W7-021	141.53	119.413	2.44	0.24386	0.0046	22.4235	0.4132	0.66677	0.00766	0.18483	0.00681	3145	15	3202	18	3293	30	3428	116	2.84197	4.70588
W7-022	234.79	45.8315	2.95	0.06957	0.00169	1.63968	0.0386	0.17092	0.00199	0.0538	0.0023	916	29	986	15	1017	11	1059	44	3.14402	11.0262
W7-023	292.95	13.5973	1.89	0.04853	0.00254	0.26381	0.01358	0.03942	0.00054	0.01262	0.00076	125	91	238	11	249	3	253	15	4.62185	99.2
W7-024	560.7	28.2455	2.53573	0.0665	0.00216	0.39579	0.01243	0.04316	0.00054	0.01636	0.00077	822.1	66.35	272.4	3.31	338.6	9.04	328	15.38	24.3025	-58.8128
W7-025	210.55	52.8826	1.42	0.07855	0.00184	2.13876	0.04845	0.19744	0.0023	0.06018	0.00224	1161	27	1161	16	1162	12	1181	43	0.0861326	0.0861326
W7-026	204.05	9.08166	2.71	0.05061	0.00375	0.26939	0.01968	0.0386	0.00061	0.01339	0.00128	223	137	242	16	244	4	269	26	0.826446	9.41704
W7-027	168.91	8.71645	2.11	0.05146	0.00364	0.30923	0.02153	0.04357	0.0007	0.01447	0.00122	261	130	274	17	275	4	290	24	0.364964	5.36398
W7-028	453.51	19.1001	3.98	0.05158	0.00202	0.27253	0.01039	0.03832	0.00049	0.01142	0.00087	267	64	245	8	242	3	230	17	-1.22449	-9.3633
W7-029	289.49	11.807	2.53	0.05348	0.00275	0.26602	0.01341	0.03607	0.00051	0.01136	0.00084	349	88	240	11	228	3	228	17	-5	-34.6705
W7-030	304.53	151.987	1.2	0.12721	0.0025	6.44541	0.12218	0.36742	0.00403	0.10943	0.00375	2060	19	2038	17	2017	19	2099	68	-1.03042	-2.08738
W7-031	366.45	57.9631	1.17	0.06311	0.00153	1.08063	0.02524	0.12417	0.00141	0.03762	0.00137	712	31	744	12	755	8	746	27	1.47849	6.03933
W7-032	530.34	174.344	0.55	0.07989	0.00164	2.25756	0.04457	0.20491	0.00221	0.06046	0.00205	1194	22	1199	14	1202	12	1187	39	0.250209	0.670017
W7-033	182.65	23.6317	1.12	0.05838	0.0021	0.79963	0.02805	0.09932	0.00129	0.02981	0.00128	544	54	597	16	610	8	594	25	2.17755	12.1324
W7-034	360.27	32.1996	2.48	0.05674	0.00167	0.59331	0.01694	0.07582	0.00091	0.02744	0.00123	481	42	473	11	471	5	547	24	-0.422833	-2.079
W7-035	836.33	32.9286	2.37	0.05039	0.00155	0.23626	0.00703	0.034	0.0004	0.01066	0.00049	213	47	215	6	216	2	214	10	0.465116	1.40845
W7-036	612.61	24.8808	1.5	0.0567	0.00203	0.2705	0.00941	0.03459	0.00044	0.01164	0.00052	480	54	243	8	219	3	234	10	-9.87654	-54.375
W7-037	516.17	52.4337	1.95	0.05837	0.0015	0.67768	0.01688	0.0842	0.00096	0.02797	0.00112	544	35	525	10	521	6	558	22	-0.761905	-4.22794
W7-038	1055.29	59.7067	2.52492	0.07305	0.00172	0.48635	0.01097	0.04828	0.00054	0.017	0.00069	1015.3	46.87	303.9	3.32	402.4	7.5	340.6	13.62	32.412	-60.3664
W7-039	282.7	130.972	1.91	0.13075	0.00267	6.56269	0.1297	0.36397	0.00405	0.10573	0.00393	2108	20	2054	17	2001	19	2031	72	-2.58033	-5.0759
W7-040	714.61	276.137	3.79	0.11119	0.00291	4.93548	0.11768	0.32192	0.00346	0.09299	0.00096	1819	49	1808	20	1799	17	1797	18	-0.497788	-1.09951
W7-041	452.96	52.535	1.93	0.05971	0.00154	0.79498	0.01979	0.09655	0.00111	0.03042	0.00125	593	34	594	11	594	7	606	25	0	0.168634
W7-042	294.06	15.4219	2.43	0.04851	0.0023	0.31984	0.01485	0.04781	0.00065	0.01408	0.00093	124	81	282	11	301	4	283	19	6.73759	142.742
W7-043	1236.22	45.4702	4.96	0.04988	0.00137	0.23255	0.0062	0.03381	0.00039	0.01076	0.00057	189	41	212	5	214	2	216	11	0.943396	13.2275
W7-044	282.51	15.5292	2.15	0.05155	0.00231	0.33141	0.01452	0.04662	0.00064	0.015	0.00089	266	75	291	11	294	4	301	18	1.03093	10.5263
W7-045	223.88	120.843	1.64	0.14482	0.00306	7.96467	0.16309	0.39883	0.00452	0.11722	0.00452	2286	20	2227	18	2164	21	2240	82	-2.82892	-5.33683
W7-046	288.23	9.5056	7.17	0.04973	0.00334	0.21297	0.01408	0.03105	0.00048	0.00871	0.00202	182	122	196	12	197	3	175	40	0.510204	8.24176
W7-047	472.59	13.181	2.53	0.0525	0.00284	0.17516	0.00928	0.02419	0.00035	0.00882	0.00062	307	94	164	8	154	2	177	12	-6.09756	-49.8371
W7-048	1784.75	71.2441	2.29	0.05092	0.00127	0.2405	0.0058	0.03425	0.00038	0.01075	0.00045	237	35	219	5	217	2	216	9	-0.913242	-8.43882
W7-049	472.59	13.181	2.53209	0.0525	0.00284	0.17516	0.00928	0.02419	0.00035	0.00882	0.00062	307.4	118.42	154.1	2.19	163.9	8.02	177.6	12.42	6.35951	-46.6818
W7-050	369.68	65.7611	0.77	0.06568	0.00174	1.14022	0.02922	0.12589	0.0015	0.03775	0.00152	796	34	773	14	764	9	749	30	-1.16429	-4.0201
W7-051	169.34	15.9391	1.24	0.05515	0.00252	0.55555	0.02482	0.07305	0.00104	0.0227	0.00117	418	74	449	16	455	6	454	23	1.3363	8.85167
W7-052	369.68	65.7611	0.774458	0.06568	0.00174	1.14022	0.02922	0.12589	0.0015	0.03775	0.00152	796.2	54.44	764.4	8.58	772.6	13.86	749	29.6	1.07274	-2.96408
W7-053	148.73	8.23275	2.79	0.05373	0.00364	0.36054	0.02406	0.04866	0.00079	0.01776	0.00156	360	122	313	18	306	5	356	31	-2.23642	-15
W7-054	249.9	50.5086	1.76	0.07589	0.00199	1.71813	0.04372	0.16418	0.002	0.05191	0.00231	1092	32	1015	16	980	11	1023	44	-3.44828	-10.2564
W7-055	223.26	39.7086	1.93	0.06803	0.00191	1.37911	0.03773	0.14702	0.00182	0.04583	0.00214	869	36	880	16	884	10	906	41	0.454545	1.72612
W7-056	674.11	29.3625	2.18	0.05004	0.00168	0.25655	0.00837	0.03718	0.00046	0.01158	0.00058	197	53	232	7	235	3	233	12	1.2931	19.2893
W7-057	120.66	23.7578	1.6	0.06743	0.00232	1.52968	0.05143	0.16451	0.00224	0.04999	0.00255	851	47	942	21	982	12	986	49	4.24628	15.3937
W7-058	210.62	49.5661	0.98	0.07195	0.00201	1.67608	0.04568	0.16892	0.00211	0.05537	0.00243	985	35	999	17	1006	12	1089	47	0.700701	2.13198
W7-059	211.2	34.3478	1.49	0.06664	0.00205	1.16791	0.03489	0.12709	0.00163	0.03991	0.00191	827	41	786	16	771	9	791	37	-1.9084	-6.77146
W7-060	119.41	23.1867	2.9	0.0717	0.00237	1.66717	0.05379	0.16861	0.00231	0.04945	0.00314	977	43	996	20	1004	13	976	60	0.803213	2.76356
W7-061	150.98	9.82762	1.9	0.0548	0.00336	0.4122	0.02483	0.05455	0.00086	0.01514	0.00121	404	107	350	18	342	5	304	24	-2.28571	-15.3465
W7-062	68.66	32.9549	1.99	0.12522	0.00339	6.63862	0.177	0.38446	0.00532	0.10709	0.00573	2032	28	2064	24	2097	25	2056	105	1.59884	3.19882
W7-063	281.33	12.0011	2.62	0.05139	0.00278	0.26735	0.01418	0.03772	0.00055	0.01379	0.00095	258	95	241	11	239	3	277	19	-0.829876	-7.36434
W7-064	1419.51	52.7882	3.23	0.05266	0.0015	0.23807	0.00658	0.03278	0.00039	0.01094	0.00055	314	41	217	5	208	2	220	11	-4.14747	-33.758
W7-065	188.08	30.1352	1.52	0.06836	0.0022	1.26788	0.03972	0.13449	0.00178	0.04138	0.00209	879	43	831	18	813	10	820	41	-2.16606	-7.50853
W7-066	107.06	42.265	2.26	0.11026	0.00296	4.91651	0.1293	0.32336	0.00425	0.09366	0.00482	1804	29	1805	22	1806	21	1810	89	0.0554017	0.110865
W7-067	466.48	18.8401	2.16	0.05024	0.00212	0.2402	0.00993	0.03467	0.00047	0.0101	0.00063	206	71	219	8	220	3	203	13	0.456621	6.79612
W7-068	523.84	20.2042	4.87	0.05084	0.00207	0.24184	0.00963	0.0345	0.00046	0.01495	0.00107	234	67	220	8	219	3	300	21	-0.454545	-6.41026
W7-069	527.9	16.8718	7.07	0.04907	0.00218	0.20637	0.00897	0.03049	0.00042	0.00835	0.00104	151	76	191	8	194	3	168	21	1.57068	28.4768
W7-070	443.03	17.4148	3.52	0.05065	0.00223	0.24374	0.0105	0.03489	0.00048	0.01194	0.00088	225	74	221	9	221	3	240	18	0	-1.77778
W7-071	260.11	13.8198	2.51	0.04684	0.00255	0.31173	0.01672	0.04827	0.0007	0.01553	0.00111	41	89	276	13	304	4	311	22	10.1449	641.463
W7-072	365.59	14.4448	2	0.05394	0.00252	0.24694	0.01129	0.0332	0.00047	0.01054	0.00068	369	77	224	9	211	3	212	14	-5.80357	-42.8184
W7-073	184.56	25.3268	4.67	0.0684	0.00228	1.17545	0.03823	0.12462	0.00168	0.03817	0.00283	881	45	789	18	757	10	757	55	-4.05577	-14.0749
W7-074	122.9	19.087	2.85	0.06486	0.00244	1.20357	0.04423	0.13457	0.0019	0.0419	0.0028	770	53	802	20	814	11	830	54	1.49626	5.71429
W7-075	160.11	7.98298	1.53	0.04957	0.00458	0.28423	0.02596	0.04158	0.00076	0.01527	0.00121	175	171	254	21	263	5	306	24	3.54331	50.2857
W7-076	158.19	9.1048	1.99	0.05498	0.0037	0.3519	0.02331	0.04642	0.00077	0.01478	0.00129	411	119	306	18	293	5	297	26	-4.24837	-28.7105
W7-077	150.95	15.2166	1.34	0.05711	0.00267	0.62777	0.02879	0.07972	0.00119	0.02369	0.00142	496	75	495	18	494	7	473	28	-0.20202	-0.403226
W7-078	449.84	5.29563	1.77	0.0498	0.00532	0.06469	0.00683	0.00942	0.00018	0.00372	0.00035	186	202	64	7	60	1	75	7	-6.25	-67.7419
W7-079	416.34	16.6013	1.4	0.05212	0.00232	0.22736	0.00988	0.03163	0.00044	0.01023	0.00058	291	74	208	8	201	3	206	12	-3.36538	-30.9278
W7-080	158.19	9.1048	1.99357	0.05498	0.0037	0.3519	0.02331	0.04642	0.00077	0.01478	0.00129	411.2	143.89	292.5	4.73	306.1	17.51	296.6	25.73	4.64957	-25.5593
W7-081	214.18	40.8573	0.83	0.06836	0.0022	1.24076	0.03892	0.13163	0.00175	0.04147	0.00212	879	43	819	18	797	10	821	41	-2.6862	-9.32878
W7-082	218.71	8.49308	2.08	0.05173	0.00362	0.23484	0.01619	0.03292	0.00055	0.00997	0.0009	273	127	214	13	209	3	201	18	-2.33645	-23.4432
W7-083	220.76	50.1915	0.91	0.07263	0.00223	1.64146	0.04918	0.1639	0.00214	0.04995	0.00256	1004	40	986	19	978	12	985	49	-0.811359	-2.58964
W7-084	221.61	12.3442	2.76	0.05735	0.00288	0.38649	0.01897	0.04887	0.00075	0.01522	0.00133	505	81	332	14	308	5	305	26	-7.22892	-39.0099
W7-085	214.18	40.8573	0.829705	0.06836	0.0022	1.24076	0.03892	0.13163	0.00175	0.04147	0.00212	879.4	65.13	797.1	9.96	819.2	17.64	821.3	41.06	2.77255	-6.84558
W7-086	187.52	1.8399	1.59	0.04732	0.01374	0.05587	0.01614	0.00856	0.00027	0.00222	0.00065	65	430	55	16	55	2	45	13	0	-15.3846
W7-087	573.83	22.9418	2.91	0.05079	0.00204	0.2447	0.00961	0.03493	0.00048	0.01143	0.00075	231	65	222	8	221	3	230	15	-0.45045	-4.329
W7-088	734.43	26.5107	3.76	0.05128	0.00208	0.23606	0.00935	0.03338	0.00046	0.01066	0.0007	253	66	215	8	212	3	214	14	-1.39535	-16.2055
W7-089	339.94	13.3811	2.89	0.04928	0.00262	0.25043	0.01309	0.03685	0.00055	0.01141	0.00097	161	92	227	11	233	3	229	19	2.64317	44.7205
W7-090	187.52	1.8399	1.59415	0.04732	0.01374	0.05587	0.01614	0.00856	0.00027	0.00222	0.00065	64.9	576.57	55	1.75	55.2	15.52	44.8	13.03	0.363636	-14.9461
W7-091	749.78	30.764	2.44	0.05209	0.00188	0.25583	0.00904	0.03562	0.00047	0.01187	0.00071	289	56	231	7	226	3	239	14	-2.1645	-21.7993
W7-092	252.06	9.60575	2.67	0.04874	0.00335	0.22782	0.01546	0.0339	0.00055	0.01141	0.00099	135	122	208	13	215	3	229	20	3.36538	59.2593
W7-093	97.54	13.5472	1	0.0605	0.00312	0.84979	0.0431	0.10186	0.00165	0.03187	0.00201	622	81	625	24	625	10	634	39	0	0.482315
W7-094	187.84	27.6471	1.55	0.0661	0.00244	1.09587	0.03953	0.12022	0.0017	0.039	0.00231	810	52	751	19	732	10	773	45	-2.52996	-9.62963
W7-095	468.48	18.2032	2.08	0.05185	0.00235	0.23873	0.01059	0.03339	0.00048	0.01092	0.00072	279	75	217	9	212	3	220	14	-2.30415	-24.0143
W7-096	518.33	86.5811	1.3	0.06943	0.00211	1.26917	0.03765	0.13256	0.00169	0.04131	0.00226	912	40	832	17	802	10	818	44	-3.60577	-12.0614
W7-097	212.18	30.8462	1.23	0.06093	0.00231	0.96412	0.03584	0.11475	0.00163	0.03472	0.00209	637	55	685	19	700	9	690	41	2.18978	9.89011
W7-098	439.41	24.7799	2.23	0.05425	0.00209	0.37354	0.01411	0.04993	0.00069	0.01585	0.00099	381	60	322	10	314	4	318	20	-2.48447	-17.5853
W7-099	967.89	60.534	1.13	0.05242	0.00177	0.34148	0.01126	0.04724	0.00062	0.01495	0.00085	304	51	298	9	298	4	300	17	0	-1.97368
W7-100	302.78	12.4888	2.25	0.05562	0.00285	0.26337	0.01321	0.03434	0.00053	0.01092	0.00085	437	84	237	11	218	3	220	17	-8.01688	-50.1144
W7-101	142.41	57.6203	2.46	0.1147	0.00359	5.24721	0.16162	0.33172	0.00456	0.09704	0.0059	1875	36	1860	26	1847	22	1872	109	-0.698925	-1.49333
W7-102	843.6	54.2413	2.22	0.05292	0.00182	0.39311	0.01321	0.05387	0.00072	0.01862	0.00112	325	52	337	10	338	4	373	22	0.296736	4
W7-103	967.89	60.534	1.1254	0.05242	0.00177	0.34148	0.01126	0.04724	0.00062	0.01495	0.00085	303.8	74.85	297.5	3.81	298.3	8.52	299.9	16.99	0.268908	-1.8104
W7-104	269.79	24.4738	1.46	0.05713	0.00234	0.59415	0.02389	0.07542	0.0011	0.02325	0.00148	497	63	474	15	469	7	465	29	-1.05485	-5.6338
W7-105	446.4	19.8009	2.2	0.05181	0.00229	0.27297	0.01183	0.03821	0.00056	0.01064	0.00078	277	72	245	9	242	3	214	16	-1.22449	-12.6354
